# Supplementary material for: Framework for rapid comparison of extracellular vesicle isolation methods
Source: eLife. 2021 Nov 16;10:e70725. doi: 10.7554/eLife.70725 (PMC8651285; doi:10.7554/eLife.70725)
Supplement: Figure 2—source data 1. [file elife-70725-fig2-data1.xlsx]

## Sheet: Plasma
	CD9 (pM)		CD63 (pM)		CD81 (pM)		Albumin (nM)			Izon 35nM	CD9 (pM)		CD63 (pM)		CD81 (pM)		Albumin (nM)		Izon 70nM	CD9 (pM)		CD63 (pM)		CD81 (pM)		Albumin (nM)
	Replicate 1	Replicate 2	Replicate 1	Replicate 2	Replicate 1	Replicate 2	Replicate 1	Replicate 2		Fraction	Replicate 1	Replicate 2	Replicate 1	Replicate 2	Replicate 1	Replicate 2	Replicate 1	Replicate 2	Fraction	Replicate 1	Replicate 2	Replicate 1	Replicate 2	Replicate 1	Replicate 2	Replicate 1	Replicate 2
Plasma Exoquick Day 1	352.352	346.377	24.3976	25.0371	917.198	1029.37	11.3092	9.58006		6	0	0	0	0	1.15513	0.685971	0.619844	0.22699	6	1.48344	2.25574	0.369562	0.279999	0	0	0.0147748	0.0165073
Plasma Exoquick Day 2	311.445	304.317	21.5386	18.1669	738.52	656.982	9.85474	10.3974		7	21.0063	18.7519	0.583195	0.601962	1.91602	5.60568	0.0488084	0.07782	7	103.054	108.436	2.68008	2.63647	12.6898	14.0821	0.0428418	0.0753015
Plasma Ultra Day 1	786.477	788.702	23.2357	27.0099	291.39	326.949	28.3941	30.5118		8	589.574	611.003	12.2317	11.6357	146.456	133.741	0.347403	0.18631	8	291.267	288.83	7.44362	7.03086	42.4322	44.9119	0.594153	0.506862
Plasma Ultra Day 2	643.627	572.491	27.6834	27.6274	261.368	325.06	35.203	38.5147		9	463.348	469.521	10.2108	9.72446	197.976	182.325	0.715839	0.237632	9	242.727	230.428	6.12394	6.28666	56.638	57.2071	0.116595	0.130348
Plasma Ultra with Wash Day 1	552.299	545.831	15.3683	14.0356	75.1002	73.3136	0.835999	0.815404		10	151.724	143.601	3.25434	4.05546	117.057	106.506	0.992223	0.894083	10	145.705	155.509	4.35865	4.61261	63.1653	50.1803	0.415186	0.410462
Plasma Ultra with Wash Day 2	453.075	397.75	13.4495	7.83032	76.651	79.0494	0.686206	0.563892		11	89.7607	83.6308	3.16816	2.26916	82.7183	76.3449	2.16563	2.12076	11	125.977	128.021	3.53317	3.48403	57.9188	71.5945	1.80273	1.52709
Plasma Exoquick Ultra Day 1	459.738	477.16	16.6733	18.017	277.985	374.872	1.79582	1.76258		12	65.8671	65.0715	2.37464	2.33765	52.598	61.3196	8.6235	9.48997	12	101.147	98.602	2.81219	2.71371	60.6161	63.7256	6.7103	6.79119
Plasma Exoquick Ultra Day 2	471.481	480.642	17.7712	18.0923	410.656	431.857	2.02398	1.91437		13	51.393	53.4499	2.44038	2.68481	43.5713	46.5232	37.6229	31.6089	13	83.3412	92.1876	2.19904	1.97932	61.4737	61.1659	12.4494	12.1612
										14	47.4895	45.9155	1.29598	1.88198	33.2309	32.7666	30.5853	35.2144	14	81.0441	75.075	2.07074	1.82715	60.2479	56.9636	12.0341	11.4446
										15	49.3104	44.8852	1.57018	1.33677	25.4317	30.3824	12.3875	13.3282	15	67.5024	74.3569	1.88573	1.63339	50.6591	54.1154	9.09348	9.30632
										16	34.0592	38.4643	1.36885	1.21725	25.1877	22.7695	7.90535	7.79022	16	55.6697	66.2104	1.84338	1.57464	47.5501	51.6261	7.88989	8.11595
										17	34.0217	31.7552	1.30454	1.2921	20.8839	22.3942	5.6302	5.5299	17	56.6405	59.0913	1.85277	1.81952	44.2629	49.6765	6.66209	6.01301
										18	21.3218	17.6836	0.929796	0.997891	21.1714	17.4534	4.5693	5.02907	18	46.0487	58.4518	1.47822	1.88957	37.054	40.7575	5.79359	6.21223
										19	15.165	20.3978	0.722545	0.891285	16.544	14.1061	4.5813	4.96602	19	51.4115	46.8378	1.41915	1.47233	36.5881	35.6817	5.9661	5.96773
										20	13.7428	13.2997	0.595118	0.609854	14.5228	14.0668	4.09177	4.2152	20	35.353	37.3808	1.32894	1.05461	30.4728	32.9051	5.31524	6.25118
										21	7.95112	8.86244	0.635976	0.749666	9.36114	9.59002	4.21911	4.02851	21	30.0329	29.5613	1.03761	1.0594	26.3285	29.0206	6.03911	6.00481

## Sheet: CSF
	CD9 (pM)		CD63 (pM)		CD81 (pM)		Albumin (nM)			Izon 35nM	CD9 (pM)		CD63 (pM)		CD81 (pM)		Albumin (nM)		Izon 70nM	CD9 (pM)		CD63 (pM)		CD81 (pM)		Albumin (nM)
	Replicate 1	Replicate 2	Replicate 1	Replicate 2	Replicate 1	Replicate 2	Replicate 1	Replicate 2		Fraction	Replicate 1	Replicate 2	Replicate 1	Replicate 2	Replicate 1	Replicate 2	Replicate 1	Replicate 2	Fraction	Replicate 1	Replicate 2	Replicate 1	Replicate 2	Replicate 1	Replicate 2	Replicate 1	Replicate 2
CSF Exoquick Day 1	167.952	174.129	1.66296	1.16433	121.35	100.87	1.29019	1.39572		6	0	0	0	0	0	0	0.178264	0.341965	6	0	0	0.312715	0.305667	0.480969	0.489211	0.0666246	0.0423312
CSF Exoquick Day 2	185.553	174.219	1.72627	1.93049	147.9	160.723	2.75387	2.93628		7	3.74	1.97253	0.188572	0.491568	1.54875	1.54593	0.221426	0.226242	7	2.38356	1.40041		0.202892	1.78635	1.47626	0.0553979	0.0331353
CSF Ultra Day 1	17.8706	14.2505	0.414681	0.42311	8.26342	8.49112	2.62407	2.1982		8	23.7162	24.9719	0.593766	0.503896	12.7724	10.1718	0.114484	0.0245069	8	17.171	17.8458	0.4657	0.310124	10.0101	9.97298	0.312111	0.373411
CSF Ultra Day 2	6.64178	7.05515	0.56398	0.250405	5.43102	5.41603	1.87901	1.78169		9	18.3224	18.2975	0.306678	0.47639	8.96449	9.07141	0.0605436	0.0276598	9	23.8407	26.2707	0.455796	0.486714	14.4771	14.4932	0.144094	0.156953
CSF Ultra with Wash Day 1	0	0	0	0	1.00279	1.02271	0.300213	0.0922322		10	5.65941	7.61272	0.203383	0.305068	3.30471	2.75912	6.33748	5.79863	10	18.8562	20.38	0.641596	0.514337	13.2136	11.2931	0.192659	0.184203
CSF Ultra with Wash Day 2	0	0	0.360837	0.301843	1.33839	1.7566	0.135045	0.149321		11	4.45731	5.81711	0.277014	0.281449	2.22671	2.57304	0.179691	0.171226	11	16.3552	17.3306	0.664029	0.364697	10.1507	9.97314	0.386874	0.325128
CSF Exoquick Ultra Day 1	0	0	0	0	1.28446	1.06367	0.109074	0.111424		12	5.76631	4.4486	0	0	2.31641	2.72014	1.10273	1.13431	12	11.6186	13.6759	0.433659	0.243364	7.4864	7.38429	1.21475	1.07259
CSF Exoquick Ultra Day 2	0	0	0.618246	0.597137	0	0	0.108146	0.095912		13	3.57572	5.76118	0.273302	0.188365	1.9316	3.19414	5.18162	5.40733	13	12.04	12.135	0.417089	0.419224	8.48762	8.35958	4.06286	3.69219
										14	4.67334	5.79553	0	0	2.34662	2.72897	13.9209	13.7784	14	15.6734	17.081	0.535052	0.579357	8.637	9.67413	8.66485	8.68354
										15	5.04565	4.22334	0.436523	0.190725	1.8394	2.14046	39.1759	37.1519	15	14.6253	14.283	0.398431	0.526884	8.41857	9.10459	13.0881	12.6549
										16	3.45835	5.84817	0	0	2.58251	2.37529	40.3411	40.3933	16	13.1977	21.9487	0	0	7.26293	9.14904	29.3739	30.3216
										17	5.74138	4.73308	0	0	1.76489	2.13267	35.2718	35.0796	17	14.7752	12.5249	0.557699	0.415465	7.7605	8.18161	37.6464	35.1801
										18	2.57988	4.35737	0	0	2.24282	2.51113	27.9756	27.4524	18	11.7787	11.7419	0.607022	0.486349	7.74865	5.76003	42.4568	38.2854
										19	3.55125	3.3132	0.238062	0.205555	1.34623	1.95234	13.8344	13.2176	19	10.9025	10.5099	0.284146	0.348245	6.03683	5.12693	37.9789	35.1467
										20	2.80268	3.22301	0	0	2.18216	1.74358	9.51465	8.86855	20	6.80615	6.3448	0.257664	0.403124	5.06727	4.13884	28.3557	29.8479
										21	2.03403	2.4191	0	0	0.91271	1.48891	6.23867	6.0355	21	6.98428	6.34229	0.552762	0.437753	4.28103	3.92485	14.5747	14.6041
