# Supplementary material for: Framework for rapid comparison of extracellular vesicle isolation methods
Source: eLife. 2021 Nov 16;10:e70725. doi: 10.7554/eLife.70725 (PMC8651285; doi:10.7554/eLife.70725)
Supplement: Figure 3—source data 1. [file elife-70725-fig3-data1.xlsx]

## Sheet: Plasma Column Comparison
Plasma
6B 10mL	CD9 (pM)		CD63 (pM)		CD81 (pM)		Albumin (nM)		6B 20mL	CD9 (pM)		CD63 (pM)		CD81 (pM)		Albumin (nM)		4B 10mL	CD9 (pM)		CD63 (pM)		CD81 (pM)		Albumin (nM)		4B 20mL	CD9 (pM)		CD63 (pM)		CD81 (pM)		Albumin (nM)		2B 10mL	CD9 (pM)		CD63 (pM)		CD81 (pM)		Albumin (nM)		2B 20mL	CD9 (pM)		CD63 (pM)
Fraction	Replicate 1	Replicate 2	Replicate 1	Replicate 2	Replicate 1	Replicate 2	Replicate 1	Replicate 2	Fraction	Replicate 1	Replicate 2	Replicate 1	Replicate 2	Replicate 1	Replicate 2	Replicate 1	Replicate 2	Fraction	Replicate 1	Replicate 2	Replicate 1	Replicate 2	Replicate 1	Replicate 2	Replicate 1	Replicate 2	Fraction	Replicate 1	Replicate 2	Replicate 1	Replicate 2	Replicate 1	Replicate 2	Replicate 1	Replicate 2	Fraction	Replicate 1	Replicate 2	Replicate 1	Replicate 2	Replicate 1	Replicate 2	Replicate 1	Replicate 2	Fraction	Replicate 1	Replicate 2	Replicate 1	Replicate 2
6	0	0	0	0	0	0	0.729951	0.688879	12	0	0	0	0	0	0	0	0	6	0	0	0	0	0	0	0	0	12	3.39804	3.65371	0	0	1.25658	0.465961	0.0111005	0.0113489	6	0	0	0	0	0	0	0.0546448	0.0726234	12	0	0	0	0
7	43.3412	44.9953	1.43982	1.29916	19.9138	17.496	0.0463403	0.0429285	13	0	0	0	0	0	0	0	0	7	27.4003	27.6774	1.04225	1.31615	13.909	15.4844	0.0166341	0.0210842	13	44.3191	45.4462	1.26629	1.29684	19.7461	23.1229	0.0309203	0.0421226	7	107.881	98.0847	3.03394	2.1858	25.132	29.0347	0.510258	0.401381	13	0	0	0	0
8	715.046	779.888	14.914	14.1223	197.872	201.343	0.890631	0.891469	14	0	0	0	0	0	0	0	0	8	249.583	260.966	10.3834	9.20073	176.923	172.399	0.209013	0.17815	14	107.758	114.129	5.08903	4.87523	84.8042	75.8013	0.0644984	0.0983974	8	362.721	331.558	11.0552	10.8149	86.747	88.0758	0.377824	0.456981	14	24.364	22.4726	0.525538	0.517631
9	612.682	577.72	12.8004	13.735	244.857		3.62004	3.84938	15	32.8555	31.4668	2.17855	1.90546	17.1194	17.7102	0.0423928	0.0770085	9	259.783	228.122	6.56828	5.97339	162.938	151.399	0.53068	0.571915	15	77.6103	75.0023	3.80173	3.57704	86.1598	84.6992	0.0429032	0.0589404	9	219.228	233.161	7.30352	7.84563	89.3516	85.085	0.727156	0.770184	15	105.874	113.07	2.2446	2.29162
10	120.574	120.244	3.17269	2.8965	74.8829	81.8158	15.496	15.2234	16	308.638	297.828	8.27322	7.73117	169.705	190.464	0.157998	0.2102	10	130.042	134.664	2.43606	2.15928	99.0042	96.3477	2.05322	2.2144	16	58.9864	60.0807	1.76991	2.20994	74.4175	71.8714	0.0571378	0.10436	10	139.425	130.711	4.68827	4.91694	75.8667	74.4432	4.20016	3.92367	16	164.339	157.053	3.17119	3.63263
11	32.852	32.8418	1.17481	1.18403	30.7609	28.0318	57.3395	56.6503	17	361.369	356.14	7.6278	8.80171	209.467	195.789	0.418263	0.333982	11	119.825	94.0657	1.31846	1.21987	80.4836	71.8017	8.14282	8.1073	17	59.0126	60.1039	1.36422	1.42237	60.4048	59.4418	0.138633	0.15009	11	97.3981	95.6968	3.14614	3.48843	70.9398	76.2337	10.5923	10.0452	17	118.76	116.735	2.97737	3.8344
12	19.7212	20.5618	0.802481	0.743183	17.3409	16.4144	36.7848	35.2023	18	142.533	152.36	3.34717	3.60706	120.532	102.619	0.581337	0.518301	12	113.26	77.9391	1.2765	1.38073	68.4913	51.8128	23.7074	28.4693	18	72.5723	60.6388	1.25419	1.31688	60.6198	54.5527	0.228899	0.290214	12	63.735	76.2609	2.74089	2.54926	63.9413	49.439	13.961	14.1849	18	78.5065	74.3914	2.78888	2.71371
13	15.8898	14.5561	0.738895	0.65982	12.9388	12.7219	13.2613	13.7991	19	64.693	66.336	1.59063	1.73631	62.4506	65.6027	1.03873	0.852417	13	110.153	105.077	1.08649	1.15912	51.9807	48.3073	29.5046	31.6128	19	70.5988	79.0814	1.37485	1.13919	51.3987	52.5343	0.557435	0.553634	13	69.2812	67.2548	2.23876	2.3184	59.6218	61.1459	12.748	8.01556	19	60.1585	60.1038	2.55638	2.37009
14	11.7444	12.6414	0.578522	0.615967	9.53782	11.0113	8.88023	8.93711	20	46.3193	37.7849	1.1307	1.02662	45.6604	47.356	1.83581	2.03496	14	95.4671	93.2986	1.05528	1.1784	39.987	37.0025	14.4603	13.6467	20	74.6043	72.3538	1.30137	1.0477	52.6329	56.0475	1.1093	1.02195	14	56.8827	63.1399	1.76525		57.6116	53.9879	10.8773	10.8424	20	54.5558	51.5715	2.492	2.06186
15	7.37921	8.78872	0.419666	0.496147	8.02736	8.66129	7.23472	6.46362	21	30.5549	33.5225	0.87502	0.950614	36.3915	31.944	4.00425	4.57049	15	79.3646	76.1297	0.965821		31.4587	34.4279	10.4577	10.4878	21	80.78	82.533	1.11931	1.18625	52.0716	49.5471	2.72201	2.66287	15	50.7361	52.9501	1.86199	1.77402	48.3219	53.9679	9.55071	8.87355	21	49.5493	56.0292	2.45753	2.28637
16	4.81532	6.3661	0.185309	0.578803	6.10587	6.9793	5.78752	5.89608	22	26.9029	24.5367	0.977914	0.965674	27.17	25.2925	8.61659	8.76926	16	64.5765	58.5403	0.734964	1.16996	21.0016	32.8457	7.71939	7.53711	22	80.4109	80.5458	1.09635	1.33372	54.3086	56.8609	5.83234	5.61065	16	44.3929	45.3662	1.68498	1.9892	44.9598	46.9011	7.46071	7.87191	22	50.2575	50.202	2.11828	2.33003
17	3.50486	3.31503	0.345158	0.430039	5.7645	5.0699	5.65614	5.29897	23	22.3547	25.8107	0.75435	1.03549	23.9504	22.4099	29.4059	27.7606	17	42.0998	38.8596	1.45903	0.818643	24.9922	27.426	6.14743	14.7894	23	87.2174	92.7607	0.978145	0.912034	44.3107	45.5755	11.0328	10.7682	17	46.0389	42.1602	1.3777	1.49001	42.1519	42.5075	7.80757	7.98496	23	45.8008	47.6541	1.7845	1.75936
18	0	0	0.183446	0.203932	4.80192	4.3038	4.09893	5.09361	24	20.0267	18.6661	0.788609	1.02216	16.8582	18.3341	51.8952	52.3746	18	28.4439	29.7117	0.5083	0.801013	17.904	18.417	5.15977	5.39037	24	91.1649	84.2409	1.44789	1.11429	42.0157	42.4848	15.5067	14.9617	18	34.2347	38.0193	1.21047	1.32158	37.1338	37.5227	7.18463	6.96224	24	46.886	49.1863	1.66737	1.90246
19	0	0	0	0	3.96143	4.1177	5.42141	5.69523	25	20.4716	17.3602	0.585086	0.82757	16.0646	16.3674	68.7447	62.8038	19	15.7394	16.1717	0.473873	0.339379	13.6038	12.5062	4.88539	5.08095	25	85.3785	86.5854	1.05431	1.1741	41.3995	42.4602	32.5995	31.6711	19	30.2189	27.594	0.941297	1.09824	32.9144	29.7137	6.83759	6.90967	25	45.9407	44.4717	1.51504	1.91113
20	0	0	0	0	2.86609	2.13759	5.04835	5.65428	26	14.697	14.5979	0.519729	0.607707	11.5265	13.0297	41.6618	48.9552	20	9.39279	9.89913	0.682829	0.452917	9.10023	9.25543	4.55089	4.91149	26	81.1423	85.2354	1.06849	1.04873	35.168	30.0683	30.9422	33.0005	20	26.1708	25.497	1.18924	0.94075	25.7614	25.5816	6.74043	6.88542	26	43.348	41.7711	1.78124	1.69315
21	0	0	0	0	2.21728	1.7341	5.33263	6.01814	27	14.6817	15.562	0.496547	0.590964	10.9511	11.5263	28.7438	28.2654	21	5.44704	4.08141	0.254101	0.327323	6.47082	6.29607	5.0003	4.97284	27	74.1414	67.2485	0.84136	0.894283	28.0397	30.9737	24.1436	24.8173	21	18.7295	20.8954	0.96433	0.67823	23.0951	23.9177	7.13133	6.02517	27	42.827	38.6621	1.27638	1.5711
[truncated: 22 more columns]

## Sheet: Plasma Sample Volume SEC 
Plasma	6B 10mL
0.1mL Sample	CD9 (pM)		CD63 (pM)		CD81 (pM)		Albumin (nM)		0.5mL Sample	CD9 (pM)		CD63 (pM)		CD81 (pM)		Albumin (nM)		1mL Sample	CD9 (pM)		CD63 (pM)		CD81 (pM)		Albumin (nM)
Fraction	Replicate 1	Replicate 2	Replicate 1	Replicate 2	Replicate 1	Replicate 2	Replicate 1	Replicate 2	Fraction	Replicate 1	Replicate 2	Replicate 1	Replicate 2	Replicate 1	Replicate 2	Replicate 1	Replicate 2	Fraction	Replicate 1	Replicate 2	Replicate 1	Replicate 2	Replicate 1	Replicate 2	Replicate 1	Replicate 2
6	0	0	0.279016	0.466194	0.947257	0.420704		0.00121011	6	1.82495	0.106471	0.360288	0.27343	0.939369	0.688816	0.00182311	0.00189178	6	4.55316	3.78945	0.482856	0.453583	1.6458	1.77169	0.00125311	0.00076563
7	0	0	0.435666	0.391617	0.459463	0.573435	0.00113398	0.00131393	7	4.07393	6.23523	0.425785	0.446284	2.10805	2.02077	0.00112071	0.00094698	7	324.638	285.81	6.84715	10.3305	90.8523	85.2728	0.00423094	0.00438286
8	17.3279	13.1776	0.764165	0.639882	4.06379	4.53855	0.00163044	0.00258824	8	311.956	284.968	9.20296	8.57871	100.659	97.1157	0.00385303	0.00454232	8	1275.11	1242.87	30.958	32.6536	263.929	258.412	0.0144342	0.013678
9	37.0596	32.7485	1.15912	1.58645	11.386	10.4714	0.00346105	0.004159	9	757.545	675.69	19.7887	19.4178	213.902	215.072	0.0138204	0.0115951	9	860.166	945.868	21.7497	23.5321	345.368	358.017	0.0315328	0.0340681
10	25.1788	22.4426	0.563083	0.739116	9.43815	9.26864	0.00966677	0.00756286	10	178.69	173.523	4.87274	5.01908	143.931	137.022	0.0257031	0.0228818	10	255.497	253.759	5.14771	6.25673	209.264	197.272	0.120219	0.104625
11	19.4091	15.1201	0.590701	0.486939	12.1286	10.9789	0.0316418	0.0327354	11	84.8921	81.6526	2.04412	2.51195	100.882	106.396	0.0938816	0.100892	11	105.337	98.4165	3.43862	2.19728	131.864	52.5268	0.40893	0.444446
12	14.6097	15.1213	0.503575	0.719775	15.545	16.6282	0.158707	0.152857	12	52.6498	57.4454	1.3525	1.55653	69.4734	74.2207	0.451909	0.422131	12	55.0053	39.9435	2.02194	2.24159	98.0216	98.6736	1.53029	1.49714
13	10.6488	12.4648	0.491515	0.635951	15.2507	15.1319	0.47109	0.47151	13	45.3395	44.5318	1.47955	1.29535	57.432	52.7795	1.56129	1.36619	13	33.4128	35.2062	1.88197	1.91323	74.4003	73.0297	1.41556	1.30358
14	8.59831	9.1361	0.380659	0.585768	10.8426	10.9331	0.582697	0.561626	14	45.3395	44.5318	1.26562	1.26373	42.7273	41.426	1.20584	1.36652	14	25.2408	24.7503	1.66611	1.24651	68.1313	62.7158	0.638602	0.566606
15	6.78546	7.67365	0.623441	0.517352	7.84917	8.75111	0.470654	0.47997	15	32.621	35.2516	0.984823	1.35064	28.5751	30.1792	0.57427	0.593735	15	19.048	18.321	2.03215	1.71065	41.2325	58.5732	0.362453	0.430923
