# Supplementary material for: Framework for rapid comparison of extracellular vesicle isolation methods
Source: eLife. 2021 Nov 16;10:e70725. doi: 10.7554/eLife.70725 (PMC8651285; doi:10.7554/eLife.70725)
Supplement: Figure 4—source data 1. [file elife-70725-fig4-data1.xlsx]

## Sheet: CSF Column Comparison
CSF
6B 10mL	CD9 (pM)		CD63 (pM)		CD81 (pM)		Albumin (nM)		6B 20mL	CD9 (pM)		CD63 (pM)		CD81 (pM)		Albumin (nM)		4B 10mL	CD9 (pM)		CD63 (pM)		CD81 (pM)		Albumin (nM)		4B 20mL	CD9 (pM)		CD63 (pM)		CD81 (pM)		Albumin (nM)		2B 10mL	CD9 (pM)		CD63 (pM)		CD81 (pM)		Albumin (nM)		2B 20mL	CD9 (pM)		CD63 (pM)
Fraction	Replicate 1	Replicate 2	Replicate 1	Replicate 2	Replicate 1	Replicate 2	Replicate 1	Replicate 2	Fraction	Replicate 1	Replicate 2	Replicate 1	Replicate 2	Replicate 1	Replicate 2	Replicate 1	Replicate 2	Fraction	Replicate 1	Replicate 2	Replicate 1	Replicate 2	Replicate 1	Replicate 2	Replicate 1	Replicate 2	Fraction	Replicate 1	Replicate 2	Replicate 1	Replicate 2	Replicate 1	Replicate 2	Replicate 1	Replicate 2	Fraction	Replicate 1	Replicate 2	Replicate 1	Replicate 2	Replicate 1	Replicate 2	Replicate 1	Replicate 2	Fraction	Replicate 1	Replicate 2	Replicate 1	Replicate 2
6	0	0	0.390675	0.328079	0	0	0	0	12	0	0	0.466224	0.354388	0	0	0	0	6	0	0	0.323294	0.144156	0	0	0	0	12	0	0	0.328056	0.277461	0	0	0	0	6	0	0	0	0	0	0	0	0	12	0	0	0	0
7	0	0	0.384395	0.260992	0.925822	1.87188	0	0	13	0	0	0.286284	0.572448	0.433882	0.956886	0	0	7	0	0	0	0	1.71825	1.50248	0	0	13	0	0	0.360161	0.307326	0	0	0	0	7	20.6526	19.7808	0.358047	0.333944	8.6822	8.67559	0.177814	0.124269	13	0	0	0.187898	0.289868
8	92.132	96.2899	2.70657	2.59186	39.8224	42.8965	0.945821	1.04694	14	0	0	0.369332	0.292312	0	0	0	0	8	64.0453	66.3215	1.57193	1.57965	25.5195	24.9332	0.317578	0.37426	14	0	0	0.304315	0.202187	0.795454	0.180921	0.0122218	0.0103328	8	56.2803	56.2382	0.871774	0.804382	26.4131	24.0562	0.358552	0.281694	14	1.34465	2.59147	0	0
9	157.206	174.101	3.9824	3.73418	64.0484	65.2452	2.82424	2.98463	15	8.3272	8.15457	0	0	6.11645	7.682	0.189012	0.197442	9	113.544	109.824	2.33763	2.16832	48.2827	56.7557	0.393098	0.433699	15	4.06995	5.18622	0.313341	0.254005	1.12148	1.83935	0.188152	0.131728	9	51.9512	56.8811	0.755183	0.644489	26.9127	26.174	0.265703	0.304356	15	10.9278	11.6315	0.31303	0.26665
10	37.0909	41.3515	1.05504	1.05529	21.5901	20.9055	5.94932	6.25721	16	21.7167	23.9424	1.51374	1.48206	11.8563	12.2119	0.458776	0.456032	10	45.7769	47.7619	0.853861	0.762414	22.552	21.9239	0.248661	0.172674	16	7.45828	7.06727	0.578096	0.708305	2.32026	2.44055	0.144105	0.160564	10	49.6237	53.0648	0.51281	0.48756	22.3697	21.4434	0.423083	0.400941	16	22.4255	20.0415	0.347998	0.452756
11	10.4344	7.74764	0.656753	0.460814	5.87848	7.28617	12.789	13.2342	17	10.5198	9.83246	1.08302	1.4742	4.43902	4.07525	0.435996	0.349686	11	21.78	21.8798	0.610053	0.547504	10.8667	11.756	0.915658	0.698859	17	6.50541	5.72548	0.620467	0.6485	2.43072	1.01356	0.0937449	0.0735217	11	37.8491	40.3301	0.739136	0.40352	17.8619	15.8923	1.11932	1.01257	17	20.7969	19.4946	0.366445	0.336126
12	6.00655	6.47851	0.439599	0.417139	3.9219	3.34935	32.8896	33.5914	18	4.00365	3.87139	0.703786	0.746984	2.23615	2.08282	0.343427	0.327651	12	13.7512	16.0379	0.513551	0.479849	10.7223	8.75826	3.21727	3.38606	18	5.34283	4.48226	0.583787	0.608402	1.39207	1.31745	0.0819816	0.0852713	12	32.2914	31.3464	0.449019	0.462163	17.8403	16.2378	2.87776	3.02392	18	17.0673	19.2006	0.188818	0.233059
13	3.39768	3.9755	0.383004	0.180724	2.01608	2.95704	43.4047	38.9483	19	3.75936	2.51299	0.540565	0.559962	1.39303	2.27605	0.442719	0.398816	13	11.3698	12.9479	0.362431	0.233792	9.87321	7.43052	10.7506	9.99435	19	3.24202	4.82739	0.89526	0.626219	1.10363	1.6217	0.0207351	0.0352192	13	30.0009	29.0632	0.392286	0.444913	13.7726	14.0805	7.08126	6.56083	19	14.9285	16.4648	0.432365	0.305107
14	0	0	0.394662	0.476553	2.83336	1.92323	35.7588	29.9988	20	1.96311	2.58326	0.492715	0.575301	1.8295	1.25473	1.11155	1.12076	14	9.66799	8.83021	0.406229	0.744948	7.00806	7.12991	30.6437	27.9524	20	2.95099	3.82965	0.457361	0.789817	2.08826	1.70173	0.012932	0.0338431	14	23.7128	26.1202	0.410133	0.596933	13.423	14.0331	11.8345	11.4247	20	17.3134	16.0438	0.379395	0.371535
15	0	0	0.357137	0.506859	1.32386	1.3154	24.9511	25.0719	21	2.62288	3.87246	0.462087	0.550487	1.13971	1.23196	2.42063	2.49949	15	5.37725	6.29801	0.228179	0.282026	5.07651	6.3549	41.4158	40.3216	21	3.33935	3.55657	0.394546	0.426638	1.33386	1.51142	0.066343	0.0679351	15	22.8264	25.9491	0.511186	0.507492	13.4582	13.5662	15.6804	15.7535	21	15.7504	16.9509	0.313832	0.452941
16	0	0	0	0	1.03205	1.0159	13.7468	12.7591	22	1.37814	2.73825	0.420546	0.358929	0.846183	0.9488	5.64764	5.38799	16	4.93299	4.53651	0.30007	0.297086	3.54627	4.39868	41.8593	41.6194	22	2.40153	3.95667	0.5513	0.411735	1.51816	1.34204	0.154616	0.13827	16	20.8109	23.0632	0.31233	0.310011	12.6884	10.7825	39.3545	35.4434	22	12.7989	15.5317	0.209288	0.494321
17	0	0	0.367553	0.26163	0.925489	1.47244	9.69625	10.8523	23	2.24391	1.01455	0.298627	0.334277	0.413032	1.50106	9.57478	9.76993	17	3.94958	4.45204	0.242442	0.189637	2.51874	3.62146	36.9787	28.0386	23	3.77063	4.62778	0	0	1.66724	1.90279	0.292913	0.243602	17	18.6053	20.1088	0.328566	0.263187	11.0658	6.48987	49.435	49.1016	23	13.413	13.1023	0.333865	0.440713
18	0	0	0	0	0	0	8.34361	9.16853	24	0	0	0.277797	0.409217	1.21651	0.972996	12.9966	13.0929	18	2.73724	1.96252	0	0	1.37324	1.8745	25.6697	25.4832	24	4.48073	3.48237	0.267922	0.387369	2.14491	1.77378	0.764079	0.608753	18	18.1387	18.3071	0.427108	0.295319	8.95289	10.9018	39.0972	41.405	24	11.8494	11.4642	0	0
19	0	0	0.702298	0.553866	1.45816	1.15704	6.28628	5.29677	25	0	0	0.254662	0.294656	0.642356	1.67703	15.3475	14.6722	19	2.00387	2.63564	0.321241	0.35058	1.28226	1.3967	12.3893	12.4483	25	4.29766	4.78825	0.184369	0.300393	2.65865	2.08766	2.22145	1.94456	19	14.8736	16.1085	0.20927	0.321637	9.89519	9.07301	41.5164	43.0358	25	11.192	10.7643	0.293686	0.2874
20	0	0	0.430979	0.379514	0	0	3.12029	3.21042	26	0	0	0.514653	0.477343	1.03404	0.743457	30.8102	27.2779	20	1.72046	1.22833	0.217633	0.186162	1.48562	1.75518	7.10112	6.71476	26	5.25279	3.57293	0	0	1.72245	1.38277	5.90693	5.2947	20	14.5657	14.4031	0.220568	0.312989	6.66434	6.53795	39.5275	38.76	26	12.9922	10.3428	0.258966	0.258835
21	0	0	0.215669	0.413973	1.07219	1.46903	1.32075	1.55208	27	0	0	0.388458	0.391884	1.15473	1.09238	30.8678	26.6289	21	0	0	0.326985	0.37764	0.772613	1.22245	2.79047	2.85269	27	4.05842	4.93396	0.554897	0.38677	1.83021	1.39516	9.42476	9.34258	21	9.56889	11.3483	0.213054	0.178595	6.52412	6.26518	33.1174	36.3678	27	11.4061	13.4085	0.436373	0.271083
[truncated: 22 more columns]

## Sheet: CSF Sample Volume SEC
CSF	6B 10mL
0.1mL Sample	CD9 (pM)		CD63 (pM)		CD81 (pM)		Albumin (nM)		0.5mL Sample	CD9 (pM)		CD63 (pM)		CD81 (pM)		Albumin (nM)		1mL Sample	CD9 (pM)		CD63 (pM)		CD81 (pM)		Albumin (nM)
Fraction	Replicate 1	Replicate 2	Replicate 1	Replicate 2	Replicate 1	Replicate 2	Replicate 1	Replicate 2	Fraction	Replicate 1	Replicate 2	Replicate 1	Replicate 2	Replicate 1	Replicate 2	Replicate 1	Replicate 2	Fraction	Replicate 1	Replicate 2	Replicate 1	Replicate 2	Replicate 1	Replicate 2	Replicate 1	Replicate 2
6	0	0	0.170962	0.251908	0.552882	0.661458	0	0	6	0	0	0.274129	0.200869	0.339778	0.607427	0.00039855	0.0002031	6	0	0	0.141409	0.260719	0.381946	0.677205	0	0
7	4.4887	3.67628	0.301683	0.390132	3.17645	2.38431	0.00094851	0.00033839	7	13.6761	12.5269	0.315717	0.333705	6.15081	5.18677	0.00319498	0.00264335	7	13.4155	13.0796	0.270443	0.488972	4.62749	4.44959	0.00206893	0.00276432
8	46.7086	49.5755	0.754729	0.607448	17.2473	18.085	0.00843403	0.007023	8	159.328	147.078	1.88833	2.00044	56.936	64.387	0.0400626	0.0362565	8	158.34	155.882	1.81787	1.72729	54.1464	51.2355	0.0393606	0.0423973
9	16.2954	17.4193	0.425037	0.386961	7.86233	7.1823	0.011519	0.0105499	9	128.618	107.121	1.35716	1.47401	53.3316	51.7198	0.0888543	0.0795109	9	316.042	361.496	4.2141	3.84324	147.56	155.342	0.144511	0.1485
10	2.92836	1.3507	0.372398	0.258179	1.57337	2.51268	0.058601	0.0521999	10	22.3687	26.7458	0.518633	0.400204	12.7561	11.4074	0.345232	0.339416	10	225.321	244.602	2.66813	2.6695	106.9	88.449	0.341262	0.406889
11	1.29245	0.495739	0.262018	0.248819	1.38624	1.29721	0.179606	0.161093	11	8.98186	9.55406	0.356553	0.281196	4.53218	6.2585	0.731311	0.716643	11	48.5902	48.6194	0.798351	0.747759	26.5063	26.1521	1.54055	1.47616
12	0.0356933	0.674804	0.251409	0.282946	1.16499	1.00091	0.278939	0.269297	12	6.1545	7.1808	0.269077	0.27955	3.88343	3.22544	1.83738	1.81636	12	16.9828	19.7802	0.396356	0.383372	9.76678	10.5183	2.81245	3.01201
13	0	0	0.215826	0.357695	0.803291	0.838225	0.35328	0.353941	13	3.86279	2.98207	0.211462	0.530784	3.1014	2.85871	2.12061	2.10689	13	9.75663	9.58248	0.491201	0.326511	6.24773	5.12544	3.97709	3.27649
14	0	0	0.24567	0.273302	1.01266	0.674041	0.338526	0.37666	14	2.09473	1.74262	0.15937	0.114973	2.50978	2.4424	2.4941	2.02284	14	6.57596	7.46303	0.286652	0.294501	4.76015	5.47779	3.84398	3.69875
15	0	0	0.241962	0.485841	0.975194	1.15082	0.278996	0.289939	15	2.00212	2.7165	0.233086	0.328003	1.2487	1.5873	2.18802	2.06121	15	5.48163	5.53676	0.447947	0.51779	4.44909	3.91727	2.71711	2.82596
