# Supplementary material for: Framework for rapid comparison of extracellular vesicle isolation methods
Source: eLife. 2021 Nov 16;10:e70725. doi: 10.7554/eLife.70725 (PMC8651285; doi:10.7554/eLife.70725)
Supplement: Figure 5—source data 1. [file elife-70725-fig5-data1.xlsx]

## Sheet: Plasma
Plasma
	CD9 (pM)		CD63 (pM)		CD81 (pM)		Albumin (nM)				CD9 (pM)		CD63 (pM)		CD81 (pM)		Albumin (nM)				CD9 (pM)		CD63 (pM)		CD81 (pM)		Albumin (nM)
	Replicate 1	Replicate 2	Replicate 1	Replicate 2	Replicate 1	Replicate 2	Replicate 1	Replicate 2			Replicate 1	Replicate 2	Replicate 1	Replicate 2	Replicate 1	Replicate 2	Replicate 1	Replicate 2			Replicate 1	Replicate 2	Replicate 1	Replicate 2	Replicate 1	Replicate 2	Replicate 1	Replicate 2
Plasma 2B 10mL F7 1	29.7827	29.011	0.449953	0	1.55144	1.13831	0	0.0238294		Plasma 4B 20mL F14 1	237.825	265.81	0	0.798691	4.14068	4.37576	0	0		Plasma 6B 10mL F7 1	11.6512	17.4673	0.232337	0.099293	1.89237	0.80666	0.00341785	0
Plasma 2B 10mL F8 1	2280.45	2492.42	12.036	11.0929	22.1493	17.3815	0	0		Plasma 4B 20mL F15 1	3562.55	4703.89	29.3872	31.2121	79.1882	108.627	0	0		Plasma 6B 10mL F8 1	8534.52	8608.82	0	111.099	589.895	570.133	0.161151	0.154622
Plasma 2B 10mL F9 1	27512.1	36496.4	100.715	114.854	143.504	137.689	0.095423	0.133931		Plasma 4B 20mL F16 1	6924.32	7065.58	93.0479	101.962	299.386	277.118	0.0800199	0.0933211		Plasma 6B 10mL F9 1	7189.12	7025.2	117.162	109.331	636.832	868.204	0.643352	0.673646
Plasma 2B 10mL F10 1	6465.51	7440.01	93.543	94.5073	193.8	187.939	0.479866	0.501262		Plasma 4B 20mL F17 1	2446.33	2347.45	51.7321	52.7932	203.043	264.537	0.071997	0.0598817		Plasma 6B 10mL F10 1	1125.22	1676.14	43.337	41.9831	283.766	314.16	4.08445	4.08445
Plasma 2B 10mL F7 2	53.0893	52.717	0	0	1.3896	0.9316	0	0		Plasma 4B 20mL F14 2	110.74	130.218	0	0.634719	1.42748	2.17668	0	0		Plasma 6B 10mL F7 2	70.268	61.6913	0	0	3.45393	2.58499	0.0131459	0.00614419
Plasma 2B 10mL F8 2	2485.94	2408.48	6.12561	5.26139	16.498	21.338	0.00493094	0.010943		Plasma 4B 20mL F15 2	2335.58	2584.3	17.5091	15.9723	72.1898	74.017	0	0.0131493		Plasma 6B 10mL F8 2	8856.67	7539.55	119.769	122.971	569.746	640.094	0.1837	0.176868
Plasma 2B 10mL F9 2	8899.42	10685.2	88.1466	79.794	141.656	139.213	0.0578173	0.00947149		Plasma 4B 20mL F16 2	3946.45	3853.43	9.55865	59.4407	237.236	213.752	0	0.0254503		Plasma 6B 10mL F9 2	6819.82	7214.7	88.6287	88.9305	512.674	527.131	0.730712	0.754359
Plasma 2B 10mL F10 2	4404.37	3861.05	71.5037	71.7741	205.773	209.377	0.39098	0.380964		Plasma 4B 20mL F17 2	1444.79	1333.71	37.8274	0	238.184	235.898	0.0422938	0.0597879		Plasma 6B 10mL F10 2	1634.47	1472.05	42.173	50.0136	299.551	300.626	4.346	3.60006
Plasma 2B 10mL F7 3	59.9041	47.6223	0	0	0.655797	0.413472	0	0		Plasma 4B 20mL F14 3	394.927	374.082	0	0.304385	5.70643	4.79011	0	0		Plasma 6B 10mL F7 3	28.3431	51.8539	0	0	1.66363	1.13595	0	0.00440258
Plasma 2B 10mL F8 3	0	2097.87	3.81773	5.31559	16.7259	16.4157	0	0		Plasma 4B 20mL F15 3	6021.56	0	33.1801	33.393	155.988	158.261	0.019037	0.00155176		Plasma 6B 10mL F8 3	4342.63	3940.77	90.7852	113.647	553.268	533.338	0.133805	0.123632
Plasma 2B 10mL F9 3	6092.91	5723.44	51.9686	56.617	138.723	121.389	0.127527	0.118725		Plasma 4B 20mL F16 3	8616.33	8658.59	97.8553	98.1516	336.851	319.426	0.0210771	0.0439331		Plasma 6B 10mL F9 3	0	4628.89	107.733	50.2653	647.549	1063.79	0.735237	0.594215
Plasma 2B 10mL F10 3	3437.81	3388.49	59.2222	60.8876	203.407	193.967	0.608035	0.610511		Plasma 4B 20mL F17 3	0	2389.39	45.6388	54.623	332.901	320.584	0.0595423	0.0562607		Plasma 6B 10mL F10 3	910.854	1701.33	46.5284	46.0455	389.955	313.638	3.89918	3.7801
Plasma 2B 10mL F7 4	77.7438	73.7592	1.19539	0.162271	2.21317	0	0	0.0285074		Plasma 4B 20mL F14 4	388.89	420.379	0.449978	0	4.83986	5.17427	0	0		Plasma 6B 10mL F7 4	28.9085	21.1339	0	0	1.61345	2.63513	0.00191177	0
Plasma 2B 10mL F8 4	3952.17	4112.76	11.279	14.084	32.6745	31.906	0.0720404	0.0392542		Plasma 4B 20mL F15 4	6944.42	7902.39	45.5753	50.0117	149.489	158.01	0.00731997	0		Plasma 6B 10mL F8 4	3176.19	3556.15	90.5606	101.533	589.911	589.001	0.172376	0.123831
Plasma 2B 10mL F9 4	11629.9	10713.9	92.0667	93.4007	163.526	160.577	0.178773	0.195393		Plasma 4B 20mL F16 4	8192.71	9149.66	16.9534	89.8117	288.484	298.064	0.0396602	0.00951987		Plasma 6B 10mL F9 4	3628.12	2401.92	99.0468	96.3112	557.875	652.577	0.673944	0.542284
Plasma 2B 10mL F10 4	5086.57	5202.05	67.7146	67.2599	206.782	192.996	0.846227	0.875386		Plasma 4B 20mL F17 4	2012.35	1962.94	45.6882	42.8156	233.546	238.77	0.0488977	0.0333008		Plasma 6B 10mL F10 4	1712.78	1708.14	51.7946	46.7675	399.004	423.277	3.71808	0

## Sheet: CSF
CSF
	CD9 (pM)		CD63 (pM)		CD81 (pM)		Albumin (nM)				CD9 (pM)		CD63 (pM)		CD81 (pM)		Albumin (nM)				CD9 (pM)		CD63 (pM)		CD81 (pM)		Albumin (nM)
	Replicate 1	Replicate 2	Replicate 1	Replicate 2	Replicate 1	Replicate 2	Replicate 1	Replicate 2			Replicate 1	Replicate 2	Replicate 1	Replicate 2	Replicate 1	Replicate 2	Replicate 1	Replicate 2			Replicate 1	Replicate 2	Replicate 1	Replicate 2	Replicate 1	Replicate 2	Replicate 1	Replicate 2
CSF 2B 10mL 1 F7	1.29947	1.67206	0.439146	0	0	0.127851	0	0.00396238		CSF 4B 10mL 1 F7	3.69857	1.88051	0.205622	0	2.46901	0.3549	0.0390482	0.0125128		CSF 6B 10mL 1 F7	3.08821	0.310041	0.205116	0.508003	0.355578	0	0.00809201	0.0397203
CSF 2B 10mL 1 F8	3.35871	8.02147	0.577531	0.177885	4.11924	5.60142	0.0481596	0.0325798		CSF 4B 10mL 1 F8	6.46137	0	0	0	22.6698	17.0492	0.0469361	0.0375894		CSF 6B 10mL 1 F8	6.91961	4.35767	0.466968	0.235606	62.7236	50.7074	0.0858197	0.10499
CSF 2B 10mL 1 F9	9.34008	2.48334	0.613219	0	0	21.6718	0.0524085	0.0222981		CSF 4B 10mL 1 F9	7.63551	2.83501	0	0.481544	50.2852	41.3377	0.609209	0.603209		CSF 6B 10mL 1 F9	28.6023	25.1613	1.00108	0.634446	263.869	258.386	0.635746	0.727702
CSF 2B 10mL 1 F10	9.20801	13.5289	0.417195	0.199198	31.3439	42.8602	0.144517	0.212922		CSF 4B 10mL 1 F10	10.2155	8.50848	0	0	49.6654	57.2276	0.315041	0.31311		CSF 6B 10mL 1 F10	25.1719	26.1542	0.378699	1.02554	85.5115	77.1387	2.2741	2.60361
CSF 2B 10mL 2 F7	1.86359	3.47044	0	0	0	0	0.0388443	0.0179246		CSF 4B 10mL 2 F7	2.16488	0.382027	0	0	1.55578	3.37679	0.00835312	0.0408648		CSF 6B 10mL 2 F7	2.56285	2.43993	0	0.314025	3.24211	0.046355	0.0899724	0.091889
CSF 2B 10mL 2 F8	2.28029	4.83363	0	0.682346	5.03504	8.34399	0.0010125	0		CSF 4B 10mL 2 F8	6.6868	8.8176	0	0.225745	23.6722	0	0.0309145	0.0442198		CSF 6B 10mL 2 F8	6.43358	10.0423	0.425779	0.434547	26.3756	0	0.12979	0.136878
CSF 2B 10mL 2 F9	4.5424	5.94474	0	1.03943	21.6606	17.1896	0.0522577	0.0253029		CSF 4B 10mL 2 F9	16.8003	10.1553	0	0.00965354	43.6261	45.5682	0.0952808	0.113806		CSF 6B 10mL 2 F9	17.1384	22.4603	0.424652	0	104.741	93.3509	0.329879	0.437433
CSF 2B 10mL 2 F10	8.10136	6.38584	0	0	25.9073	38.2944	0.171825	0.229805		CSF 4B 10mL 2 F10	5.69348	8.26034	0	0.275759	45.585	40.6715	0.37263	0.301966		CSF 6B 10mL 2 F10	10.8359	9.40982	0.517715	0.359	50.3892	82.6121	1.92278	1.8568
CSF 2B 10mL 3 F7	2.03266	4.20224	0.188552	0	0.088116	0.126385	0.0150013	0.0200868		CSF 4B 10mL 3 F7	2.38451	0.979518	0	0	1.95049	1.02896	0.0195502	0.0389348		CSF 6B 10mL 3 F7	1.69814	2.0416	0	0.141128	2.35289	1.01394	0.0666818	0.0983782
CSF 2B 10mL 3 F8	3.00065	5.29487	0	0	5.48631	3.19361	0.00599635	0.0260682		CSF 4B 10mL 3 F8	12.4685	11.1121	1.13541	0.35361	25.8073	33.2342	0.10527	0.0612646		CSF 6B 10mL 3 F8	3.3806	4.22005	0	0.276047	20.3099	21.9982	0.105447	0.114556
CSF 2B 10mL 3 F9	4.87484	4.87278	0.507192	0.576926	17.6083	16.5373	0.0245589	0.0344348		CSF 4B 10mL 3 F9	12.5452	11.3256	0	0.0578926	2.82961	0	0.0908887	0.0970609		CSF 6B 10mL 3 F9	12.9315	16.5381	0.719001	0.91539	89.4309	80.155	0	0.38712
CSF 2B 10mL 3 F10	6.4442	9.63759	0.516361	0	46.6672	37.645	0.2388	0.0643789		CSF 4B 10mL 3 F10	5.54426	3.70198	0	0	27.9248	28.3618	0.166502	0.148765		CSF 6B 10mL 3 F10	1.13593	9.0517	1.48255	3.21104	20.6834	56.4798	1.77228	1.75546
CSF 2B 10mL 4 F7	0.899352	0	0	0.332684	0	1.57013	0	0.0162918		CSF 4B 10mL 4 F7	4.92084	3.37973	0	0.246217	3.1363	2.74181	0.0303899	0		CSF 6B 10mL 4 F7	3.5527	1.53825	0	0	0.107204	1.19065	0.0629128	0.0949071
CSF 2B 10mL 4 F8	0.562849	0	0	0	3.09228	4.50958	0	0		CSF 4B 10mL 4 F8	9.71905	1.26751	0.0339419	0.819604	21.1783	16.8926	0.00372854	0.0596118		CSF 6B 10mL 4 F8	6.46941	4.24976	0	0.320071	69.5484	77.2647	0.16165	0.188524
CSF 2B 10mL 4 F9	5.83167	8.80121	0.263245	0.113689	0	23.9288	0.0703637	0.0623565		CSF 4B 10mL 4 F9	9.14202	12.0915	0.280671	0	45.9629	52.5146	0.0925645	0.0855644		CSF 6B 10mL 4 F9	58.5871	78.9286	1.93693	2.02801	383.94	399.14	1.31175	1.25626
CSF 2B 10mL 4 F10	12.7325	9.06871	0.0257225	0	48.1886	47.9177	0.160857	0.222732		CSF 4B 10mL 4 F10	0.865937	5.49086	0	0.422886	41.8656	41.7645	0.284288	0.287078		CSF 6B 10mL 4 F10	42.6799	40.0191	1.35944	0.115911	49.8378	60.6084	2.53604	2.5479
