# Supplementary material for: Framework for rapid comparison of extracellular vesicle isolation methods
Source: eLife. 2021 Nov 16;10:e70725. doi: 10.7554/eLife.70725 (PMC8651285; doi:10.7554/eLife.70725)
Supplement: Source data 1. [file elife-70725-supp1.xlsx]

## Sheet: Plasma_Fig2-4_S5-6
Plasma
6B 10mL	CD9 (pM)		CD63 (pM)		CD81 (pM)		Albumin (nM)		6B 20mL	CD9 (pM)		CD63 (pM)		CD81 (pM)		Albumin (nM)		4B 10mL	CD9 (pM)		CD63 (pM)		CD81 (pM)		Albumin (nM)		4B 20mL	CD9 (pM)		CD63 (pM)		CD81 (pM)		Albumin (nM)		2B 10mL	CD9 (pM)		CD63 (pM)		CD81 (pM)		Albumin (nM)		2B 20mL	CD9 (pM)		CD63 (pM)
Fraction	Replicate 1	Replicate 2	Replicate 1	Replicate 2	Replicate 1	Replicate 2	Replicate 1	Replicate 2	Fraction	Replicate 1	Replicate 2	Replicate 1	Replicate 2	Replicate 1	Replicate 2	Replicate 1	Replicate 2	Fraction	Replicate 1	Replicate 2	Replicate 1	Replicate 2	Replicate 1	Replicate 2	Replicate 1	Replicate 2	Fraction	Replicate 1	Replicate 2	Replicate 1	Replicate 2	Replicate 1	Replicate 2	Replicate 1	Replicate 2	Fraction	Replicate 1	Replicate 2	Replicate 1	Replicate 2	Replicate 1	Replicate 2	Replicate 1	Replicate 2	Fraction	Replicate 1	Replicate 2	Replicate 1	Replicate 2
6	0	0	0	0	0	0	0.729951	0.688879	12	0	0	0	0	0	0	0	0	6	0	0	0	0	0	0	0	0	12	3.39804	3.65371	0	0	1.25658	0.465961	0.0111005	0.0113489	6	0	0	0	0	0	0	0.0546448	0.0726234	12	0	0	0	0
7	43.3412	44.9953	1.43982	1.29916	19.9138	17.496	0.0463403	0.0429285	13	0	0	0	0	0	0	0	0	7	27.4003	27.6774	1.04225	1.31615	13.909	15.4844	0.0166341	0.0210842	13	44.3191	45.4462	1.26629	1.29684	19.7461	23.1229	0.0309203	0.0421226	7	107.881	98.0847	3.03394	2.1858	25.132	29.0347	0.510258	0.401381	13	0	0	0	0
8	715.046	779.888	14.914	14.1223	197.872	201.343	0.890631	0.891469	14	0	0	0	0	0	0	0	0	8	249.583	260.966	10.3834	9.20073	176.923	172.399	0.209013	0.17815	14	107.758	114.129	5.08903	4.87523	84.8042	75.8013	0.0644984	0.0983974	8	362.721	331.558	11.0552	10.8149	86.747	88.0758	0.377824	0.456981	14	24.364	22.4726	0.525538	0.517631
9	612.682	577.72	12.8004	13.735	244.857		3.62004	3.84938	15	32.8555	31.4668	2.17855	1.90546	17.1194	17.7102	0.0423928	0.0770085	9	259.783	228.122	6.56828	5.97339	162.938	151.399	0.53068	0.571915	15	77.6103	75.0023	3.80173	3.57704	86.1598	84.6992	0.0429032	0.0589404	9	219.228	233.161	7.30352	7.84563	89.3516	85.085	0.727156	0.770184	15	105.874	113.07	2.2446	2.29162
10	120.574	120.244	3.17269	2.8965	74.8829	81.8158	15.496	15.2234	16	308.638	297.828	8.27322	7.73117	169.705	190.464	0.157998	0.2102	10	130.042	134.664	2.43606	2.15928	99.0042	96.3477	2.05322	2.2144	16	58.9864	60.0807	1.76991	2.20994	74.4175	71.8714	0.0571378	0.10436	10	139.425	130.711	4.68827	4.91694	75.8667	74.4432	4.20016	3.92367	16	164.339	157.053	3.17119	3.63263
11	32.852	32.8418	1.17481	1.18403	30.7609	28.0318	57.3395	56.6503	17	361.369	356.14	7.6278	8.80171	209.467	195.789	0.418263	0.333982	11	119.825	94.0657	1.31846	1.21987	80.4836	71.8017	8.14282	8.1073	17	59.0126	60.1039	1.36422	1.42237	60.4048	59.4418	0.138633	0.15009	11	97.3981	95.6968	3.14614	3.48843	70.9398	76.2337	10.5923	10.0452	17	118.76	116.735	2.97737	3.8344
12	19.7212	20.5618	0.802481	0.743183	17.3409	16.4144	36.7848	35.2023	18	142.533	152.36	3.34717	3.60706	120.532	102.619	0.581337	0.518301	12	113.26	77.9391	1.2765	1.38073	68.4913	51.8128	23.7074	28.4693	18	72.5723	60.6388	1.25419	1.31688	60.6198	54.5527	0.228899	0.290214	12	63.735	76.2609	2.74089	2.54926	63.9413	49.439	13.961	14.1849	18	78.5065	74.3914	2.78888	2.71371
13	15.8898	14.5561	0.738895	0.65982	12.9388	12.7219	13.2613	13.7991	19	64.693	66.336	1.59063	1.73631	62.4506	65.6027	1.03873	0.852417	13	110.153	105.077	1.08649	1.15912	51.9807	48.3073	29.5046	31.6128	19	70.5988	79.0814	1.37485	1.13919	51.3987	52.5343	0.557435	0.553634	13	69.2812	67.2548	2.23876	2.3184	59.6218	61.1459	12.748	8.01556	19	60.1585	60.1038	2.55638	2.37009
14	11.7444	12.6414	0.578522	0.615967	9.53782	11.0113	8.88023	8.93711	20	46.3193	37.7849	1.1307	1.02662	45.6604	47.356	1.83581	2.03496	14	95.4671	93.2986	1.05528	1.1784	39.987	37.0025	14.4603	13.6467	20	74.6043	72.3538	1.30137	1.0477	52.6329	56.0475	1.1093	1.02195	14	56.8827	63.1399	1.76525		57.6116	53.9879	10.8773	10.8424	20	54.5558	51.5715	2.492	2.06186
15	7.37921	8.78872	0.419666	0.496147	8.02736	8.66129	7.23472	6.46362	21	30.5549	33.5225	0.87502	0.950614	36.3915	31.944	4.00425	4.57049	15	79.3646	76.1297	0.965821		31.4587	34.4279	10.4577	10.4878	21	80.78	82.533	1.11931	1.18625	52.0716	49.5471	2.72201	2.66287	15	50.7361	52.9501	1.86199	1.77402	48.3219	53.9679	9.55071	8.87355	21	49.5493	56.0292	2.45753	2.28637
16	4.81532	6.3661	0.185309	0.578803	6.10587	6.9793	5.78752	5.89608	22	26.9029	24.5367	0.977914	0.965674	27.17	25.2925	8.61659	8.76926	16	64.5765	58.5403	0.734964	1.16996	21.0016	32.8457	7.71939	7.53711	22	80.4109	80.5458	1.09635	1.33372	54.3086	56.8609	5.83234	5.61065	16	44.3929	45.3662	1.68498	1.9892	44.9598	46.9011	7.46071	7.87191	22	50.2575	50.202	2.11828	2.33003
17	3.50486	3.31503	0.345158	0.430039	5.7645	5.0699	5.65614	5.29897	23	22.3547	25.8107	0.75435	1.03549	23.9504	22.4099	29.4059	27.7606	17	42.0998	38.8596	1.45903	0.818643	24.9922	27.426	6.14743	14.7894	23	87.2174	92.7607	0.978145	0.912034	44.3107	45.5755	11.0328	10.7682	17	46.0389	42.1602	1.3777	1.49001	42.1519	42.5075	7.80757	7.98496	23	45.8008	47.6541	1.7845	1.75936
18	0	0	0.183446	0.203932	4.80192	4.3038	4.09893	5.09361	24	20.0267	18.6661	0.788609	1.02216	16.8582	18.3341	51.8952	52.3746	18	28.4439	29.7117	0.5083	0.801013	17.904	18.417	5.15977	5.39037	24	91.1649	84.2409	1.44789	1.11429	42.0157	42.4848	15.5067	14.9617	18	34.2347	38.0193	1.21047	1.32158	37.1338	37.5227	7.18463	6.96224	24	46.886	49.1863	1.66737	1.90246
19	0	0	0	0	3.96143	4.1177	5.42141	5.69523	25	20.4716	17.3602	0.585086	0.82757	16.0646	16.3674	68.7447	62.8038	19	15.7394	16.1717	0.473873	0.339379	13.6038	12.5062	4.88539	5.08095	25	85.3785	86.5854	1.05431	1.1741	41.3995	42.4602	32.5995	31.6711	19	30.2189	27.594	0.941297	1.09824	32.9144	29.7137	6.83759	6.90967	25	45.9407	44.4717	1.51504	1.91113
20	0	0	0	0	2.86609	2.13759	5.04835	5.65428	26	14.697	14.5979	0.519729	0.607707	11.5265	13.0297	41.6618	48.9552	20	9.39279	9.89913	0.682829	0.452917	9.10023	9.25543	4.55089	4.91149	26	81.1423	85.2354	1.06849	1.04873	35.168	30.0683	30.9422	33.0005	20	26.1708	25.497	1.18924	0.94075	25.7614	25.5816	6.74043	6.88542	26	43.348	41.7711	1.78124	1.69315
21	0	0	0	0	2.21728	1.7341	5.33263	6.01814	27	14.6817	15.562	0.496547	0.590964	10.9511	11.5263	28.7438	28.2654	21	5.44704	4.08141	0.254101	0.327323	6.47082	6.29607	5.0003	4.97284	27	74.1414	67.2485	0.84136	0.894283	28.0397	30.9737	24.1436	24.8173	21	18.7295	20.8954	0.96433	0.67823	23.0951	23.9177	7.13133	6.02517	27	42.827	38.6621	1.27638	1.5711
	CD9 (pM)		CD63 (pM)		CD81 (pM)		Albumin (nM)
	Replicate 1	Replicate 2	Replicate 1	Replicate 2	Replicate 1	Replicate 2	Replicate 1	Replicate 2
Plasma Exoquick Day 1	352.352	346.377	24.3976	25.0371	917.198	1029.37	11.3092	9.58006
Plasma Exoquick Day 2	311.445	304.317	21.5386	18.1669	738.52	656.982	9.85474	10.3974
Plasma Ultra Day 1	786.477	788.702	23.2357	27.0099	291.39	326.949	28.3941	30.5118
Plasma Ultra Day 2	643.627	572.491	27.6834	27.6274	261.368	325.06	35.203	38.5147
Plasma Ultra with Wash Day 1	552.299	545.831	15.3683	14.0356	75.1002	73.3136	0.835999	0.815404
Plasma Ultra with Wash Day 2	453.075	397.75	13.4495	7.83032	76.651	79.0494	0.686206	0.563892
Plasma Exoquick Ultra Day 1	459.738	477.16	16.6733	18.017	277.985	374.872	1.79582	1.76258
Plasma Exoquick Ultra Day 2	471.481	480.642	17.7712	18.0923	410.656	431.857	2.02398	1.91437
[truncated: 22 more columns]

## Sheet: CSF_Fig2-4_S5-6
CSF
6B 10mL	CD9 (pM)		CD63 (pM)		CD81 (pM)		Albumin (nM)		6B 20mL	CD9 (pM)		CD63 (pM)		CD81 (pM)		Albumin (nM)		4B 10mL	CD9 (pM)		CD63 (pM)		CD81 (pM)		Albumin (nM)		4B 20mL	CD9 (pM)		CD63 (pM)		CD81 (pM)		Albumin (nM)		2B 10mL	CD9 (pM)		CD63 (pM)		CD81 (pM)		Albumin (nM)		2B 20mL	CD9 (pM)		CD63 (pM)
Fraction	Replicate 1	Replicate 2	Replicate 1	Replicate 2	Replicate 1	Replicate 2	Replicate 1	Replicate 2	Fraction	Replicate 1	Replicate 2	Replicate 1	Replicate 2	Replicate 1	Replicate 2	Replicate 1	Replicate 2	Fraction	Replicate 1	Replicate 2	Replicate 1	Replicate 2	Replicate 1	Replicate 2	Replicate 1	Replicate 2	Fraction	Replicate 1	Replicate 2	Replicate 1	Replicate 2	Replicate 1	Replicate 2	Replicate 1	Replicate 2	Fraction	Replicate 1	Replicate 2	Replicate 1	Replicate 2	Replicate 1	Replicate 2	Replicate 1	Replicate 2	Fraction	Replicate 1	Replicate 2	Replicate 1	Replicate 2
6	0	0	0.390675	0.328079	0	0	0	0	12	0	0	0.466224	0.354388	0	0	0	0	6	0	0	0.323294	0.144156	0	0	0	0	12	0	0	0.328056	0.277461	0	0	0	0	6	0	0	0	0	0	0	0	0	12	0	0	0	0
7	0	0	0.384395	0.260992	0.925822	1.87188	0	0	13	0	0	0.286284	0.572448	0.433882	0.956886	0	0	7	0	0	0	0	1.71825	1.50248	0	0	13	0	0	0.360161	0.307326	0	0	0	0	7	20.6526	19.7808	0.358047	0.333944	8.6822	8.67559	0.177814	0.124269	13	0	0	0.187898	0.289868
8	92.132	96.2899	2.70657	2.59186	39.8224	42.8965	0.945821	1.04694	14	0	0	0.369332	0.292312	0	0	0	0	8	64.0453	66.3215	1.57193	1.57965	25.5195	24.9332	0.317578	0.37426	14	0	0	0.304315	0.202187	0.795454	0.180921	0.0122218	0.0103328	8	56.2803	56.2382	0.871774	0.804382	26.4131	24.0562	0.358552	0.281694	14	1.34465	2.59147	0	0
9	157.206	174.101	3.9824	3.73418	64.0484	65.2452	2.82424	2.98463	15	8.3272	8.15457	0	0	6.11645	7.682	0.189012	0.197442	9	113.544	109.824	2.33763	2.16832	48.2827	56.7557	0.393098	0.433699	15	4.06995	5.18622	0.313341	0.254005	1.12148	1.83935	0.188152	0.131728	9	51.9512	56.8811	0.755183	0.644489	26.9127	26.174	0.265703	0.304356	15	10.9278	11.6315	0.31303	0.26665
10	37.0909	41.3515	1.05504	1.05529	21.5901	20.9055	5.94932	6.25721	16	21.7167	23.9424	1.51374	1.48206	11.8563	12.2119	0.458776	0.456032	10	45.7769	47.7619	0.853861	0.762414	22.552	21.9239	0.248661	0.172674	16	7.45828	7.06727	0.578096	0.708305	2.32026	2.44055	0.144105	0.160564	10	49.6237	53.0648	0.51281	0.48756	22.3697	21.4434	0.423083	0.400941	16	22.4255	20.0415	0.347998	0.452756
11	10.4344	7.74764	0.656753	0.460814	5.87848	7.28617	12.789	13.2342	17	10.5198	9.83246	1.08302	1.4742	4.43902	4.07525	0.435996	0.349686	11	21.78	21.8798	0.610053	0.547504	10.8667	11.756	0.915658	0.698859	17	6.50541	5.72548	0.620467	0.6485	2.43072	1.01356	0.0937449	0.0735217	11	37.8491	40.3301	0.739136	0.40352	17.8619	15.8923	1.11932	1.01257	17	20.7969	19.4946	0.366445	0.336126
12	6.00655	6.47851	0.439599	0.417139	3.9219	3.34935	32.8896	33.5914	18	4.00365	3.87139	0.703786	0.746984	2.23615	2.08282	0.343427	0.327651	12	13.7512	16.0379	0.513551	0.479849	10.7223	8.75826	3.21727	3.38606	18	5.34283	4.48226	0.583787	0.608402	1.39207	1.31745	0.0819816	0.0852713	12	32.2914	31.3464	0.449019	0.462163	17.8403	16.2378	2.87776	3.02392	18	17.0673	19.2006	0.188818	0.233059
13	3.39768	3.9755	0.383004	0.180724	2.01608	2.95704	43.4047	38.9483	19	3.75936	2.51299	0.540565	0.559962	1.39303	2.27605	0.442719	0.398816	13	11.3698	12.9479	0.362431	0.233792	9.87321	7.43052	10.7506	9.99435	19	3.24202	4.82739	0.89526	0.626219	1.10363	1.6217	0.0207351	0.0352192	13	30.0009	29.0632	0.392286	0.444913	13.7726	14.0805	7.08126	6.56083	19	14.9285	16.4648	0.432365	0.305107
14	0	0	0.394662	0.476553	2.83336	1.92323	35.7588	29.9988	20	1.96311	2.58326	0.492715	0.575301	1.8295	1.25473	1.11155	1.12076	14	9.66799	8.83021	0.406229	0.744948	7.00806	7.12991	30.6437	27.9524	20	2.95099	3.82965	0.457361	0.789817	2.08826	1.70173	0.012932	0.0338431	14	23.7128	26.1202	0.410133	0.596933	13.423	14.0331	11.8345	11.4247	20	17.3134	16.0438	0.379395	0.371535
15	0	0	0.357137	0.506859	1.32386	1.3154	24.9511	25.0719	21	2.62288	3.87246	0.462087	0.550487	1.13971	1.23196	2.42063	2.49949	15	5.37725	6.29801	0.228179	0.282026	5.07651	6.3549	41.4158	40.3216	21	3.33935	3.55657	0.394546	0.426638	1.33386	1.51142	0.066343	0.0679351	15	22.8264	25.9491	0.511186	0.507492	13.4582	13.5662	15.6804	15.7535	21	15.7504	16.9509	0.313832	0.452941
16	0	0	0	0	1.03205	1.0159	13.7468	12.7591	22	1.37814	2.73825	0.420546	0.358929	0.846183	0.9488	5.64764	5.38799	16	4.93299	4.53651	0.30007	0.297086	3.54627	4.39868	41.8593	41.6194	22	2.40153	3.95667	0.5513	0.411735	1.51816	1.34204	0.154616	0.13827	16	20.8109	23.0632	0.31233	0.310011	12.6884	10.7825	39.3545	35.4434	22	12.7989	15.5317	0.209288	0.494321
17	0	0	0.367553	0.26163	0.925489	1.47244	9.69625	10.8523	23	2.24391	1.01455	0.298627	0.334277	0.413032	1.50106	9.57478	9.76993	17	3.94958	4.45204	0.242442	0.189637	2.51874	3.62146	36.9787	28.0386	23	3.77063	4.62778	0	0	1.66724	1.90279	0.292913	0.243602	17	18.6053	20.1088	0.328566	0.263187	11.0658	6.48987	49.435	49.1016	23	13.413	13.1023	0.333865	0.440713
18	0	0	0	0	0	0	8.34361	9.16853	24	0	0	0.277797	0.409217	1.21651	0.972996	12.9966	13.0929	18	2.73724	1.96252	0	0	1.37324	1.8745	25.6697	25.4832	24	4.48073	3.48237	0.267922	0.387369	2.14491	1.77378	0.764079	0.608753	18	18.1387	18.3071	0.427108	0.295319	8.95289	10.9018	39.0972	41.405	24	11.8494	11.4642	0	0
19	0	0	0.702298	0.553866	1.45816	1.15704	6.28628	5.29677	25	0	0	0.254662	0.294656	0.642356	1.67703	15.3475	14.6722	19	2.00387	2.63564	0.321241	0.35058	1.28226	1.3967	12.3893	12.4483	25	4.29766	4.78825	0.184369	0.300393	2.65865	2.08766	2.22145	1.94456	19	14.8736	16.1085	0.20927	0.321637	9.89519	9.07301	41.5164	43.0358	25	11.192	10.7643	0.293686	0.2874
20	0	0	0.430979	0.379514	0	0	3.12029	3.21042	26	0	0	0.514653	0.477343	1.03404	0.743457	30.8102	27.2779	20	1.72046	1.22833	0.217633	0.186162	1.48562	1.75518	7.10112	6.71476	26	5.25279	3.57293	0	0	1.72245	1.38277	5.90693	5.2947	20	14.5657	14.4031	0.220568	0.312989	6.66434	6.53795	39.5275	38.76	26	12.9922	10.3428	0.258966	0.258835
21	0	0	0.215669	0.413973	1.07219	1.46903	1.32075	1.55208	27	0	0	0.388458	0.391884	1.15473	1.09238	30.8678	26.6289	21	0	0	0.326985	0.37764	0.772613	1.22245	2.79047	2.85269	27	4.05842	4.93396	0.554897	0.38677	1.83021	1.39516	9.42476	9.34258	21	9.56889	11.3483	0.213054	0.178595	6.52412	6.26518	33.1174	36.3678	27	11.4061	13.4085	0.436373	0.271083
	CD9 (pM)		CD63 (pM)		CD81 (pM)		Albumin (nM)
	Replicate 1	Replicate 2	Replicate 1	Replicate 2	Replicate 1	Replicate 2	Replicate 1	Replicate 2
CSF Exoquick Day 1	167.952	174.129	1.66296	1.16433	121.35	100.87	1.29019	1.39572
CSF Exoquick Day 2	185.553	174.219	1.72627	1.93049	147.9	160.723	2.75387	2.93628
CSF Ultra Day 1	17.8706	14.2505	0.414681	0.42311	8.26342	8.49112	2.62407	2.1982
CSF Ultra Day 2	6.64178	7.05515	0.56398	0.250405	5.43102	5.41603	1.87901	1.78169
CSF Ultra with Wash Day 1	0	0	0	0	1.00279	1.02271	0.300213	0.0922322
CSF Ultra with Wash Day 2	0	0	0.360837	0.301843	1.33839	1.7566	0.135045	0.149321
CSF Exoquick Ultra Day 1	0	0	0	0	1.28446	1.06367	0.109074	0.111424
CSF Exoquick Ultra Day 2	0	0	0.618246	0.597137	0	0	0.108146	0.095912
[truncated: 22 more columns]

## Sheet: S4_Plasma
Plasma	6B 10mL
0.1mL Sample	CD9 (pM)		CD63 (pM)		CD81 (pM)		Albumin (nM)		0.5mL Sample	CD9 (pM)		CD63 (pM)		CD81 (pM)		Albumin (nM)		1mL Sample	CD9 (pM)		CD63 (pM)		CD81 (pM)		Albumin (nM)
Fraction	Replicate 1	Replicate 2	Replicate 1	Replicate 2	Replicate 1	Replicate 2	Replicate 1	Replicate 2	Fraction	Replicate 1	Replicate 2	Replicate 1	Replicate 2	Replicate 1	Replicate 2	Replicate 1	Replicate 2	Fraction	Replicate 1	Replicate 2	Replicate 1	Replicate 2	Replicate 1	Replicate 2	Replicate 1	Replicate 2
6	0	0	0.279016	0.466194	0.947257	0.420704		0.00121011	6	1.82495	0.106471	0.360288	0.27343	0.939369	0.688816	0.00182311	0.00189178	6	4.55316	3.78945	0.482856	0.453583	1.6458	1.77169	0.00125311	0.00076563
7	0	0	0.435666	0.391617	0.459463	0.573435	0.00113398	0.00131393	7	4.07393	6.23523	0.425785	0.446284	2.10805	2.02077	0.00112071	0.00094698	7	324.638	285.81	6.84715	10.3305	90.8523	85.2728	0.00423094	0.00438286
8	17.3279	13.1776	0.764165	0.639882	4.06379	4.53855	0.00163044	0.00258824	8	311.956	284.968	9.20296	8.57871	100.659	97.1157	0.00385303	0.00454232	8	1275.11	1242.87	30.958	32.6536	263.929	258.412	0.0144342	0.013678
9	37.0596	32.7485	1.15912	1.58645	11.386	10.4714	0.00346105	0.004159	9	757.545	675.69	19.7887	19.4178	213.902	215.072	0.0138204	0.0115951	9	860.166	945.868	21.7497	23.5321	345.368	358.017	0.0315328	0.0340681
10	25.1788	22.4426	0.563083	0.739116	9.43815	9.26864	0.00966677	0.00756286	10	178.69	173.523	4.87274	5.01908	143.931	137.022	0.0257031	0.0228818	10	255.497	253.759	5.14771	6.25673	209.264	197.272	0.120219	0.104625
11	19.4091	15.1201	0.590701	0.486939	12.1286	10.9789	0.0316418	0.0327354	11	84.8921	81.6526	2.04412	2.51195	100.882	106.396	0.0938816	0.100892	11	105.337	98.4165	3.43862	2.19728	131.864	52.5268	0.40893	0.444446
12	14.6097	15.1213	0.503575	0.719775	15.545	16.6282	0.158707	0.152857	12	52.6498	57.4454	1.3525	1.55653	69.4734	74.2207	0.451909	0.422131	12	55.0053	39.9435	2.02194	2.24159	98.0216	98.6736	1.53029	1.49714
13	10.6488	12.4648	0.491515	0.635951	15.2507	15.1319	0.47109	0.47151	13	45.3395	44.5318	1.47955	1.29535	57.432	52.7795	1.56129	1.36619	13	33.4128	35.2062	1.88197	1.91323	74.4003	73.0297	1.41556	1.30358
14	8.59831	9.1361	0.380659	0.585768	10.8426	10.9331	0.582697	0.561626	14	45.3395	44.5318	1.26562	1.26373	42.7273	41.426	1.20584	1.36652	14	25.2408	24.7503	1.66611	1.24651	68.1313	62.7158	0.638602	0.566606
15	6.78546	7.67365	0.623441	0.517352	7.84917	8.75111	0.470654	0.47997	15	32.621	35.2516	0.984823	1.35064	28.5751	30.1792	0.57427	0.593735	15	19.048	18.321	2.03215	1.71065	41.2325	58.5732	0.362453	0.430923

## Sheet: S4_CSF
CSF	6B 10mL
0.1mL Sample	CD9 (pM)		CD63 (pM)		CD81 (pM)		Albumin (nM)		0.5mL Sample	CD9 (pM)		CD63 (pM)		CD81 (pM)		Albumin (nM)		1mL Sample	CD9 (pM)		CD63 (pM)		CD81 (pM)		Albumin (nM)
Fraction	Replicate 1	Replicate 2	Replicate 1	Replicate 2	Replicate 1	Replicate 2	Replicate 1	Replicate 2	Fraction	Replicate 1	Replicate 2	Replicate 1	Replicate 2	Replicate 1	Replicate 2	Replicate 1	Replicate 2	Fraction	Replicate 1	Replicate 2	Replicate 1	Replicate 2	Replicate 1	Replicate 2	Replicate 1	Replicate 2
6	0	0	0.170962	0.251908	0.552882	0.661458	0	0	6	0	0	0.274129	0.200869	0.339778	0.607427	0.00039855	0.0002031	6	0	0	0.141409	0.260719	0.381946	0.677205	0	0
7	4.4887	3.67628	0.301683	0.390132	3.17645	2.38431	0.00094851	0.00033839	7	13.6761	12.5269	0.315717	0.333705	6.15081	5.18677	0.00319498	0.00264335	7	13.4155	13.0796	0.270443	0.488972	4.62749	4.44959	0.00206893	0.00276432
8	46.7086	49.5755	0.754729	0.607448	17.2473	18.085	0.00843403	0.007023	8	159.328	147.078	1.88833	2.00044	56.936	64.387	0.0400626	0.0362565	8	158.34	155.882	1.81787	1.72729	54.1464	51.2355	0.0393606	0.0423973
9	16.2954	17.4193	0.425037	0.386961	7.86233	7.1823	0.011519	0.0105499	9	128.618	107.121	1.35716	1.47401	53.3316	51.7198	0.0888543	0.0795109	9	316.042	361.496	4.2141	3.84324	147.56	155.342	0.144511	0.1485
10	2.92836	1.3507	0.372398	0.258179	1.57337	2.51268	0.058601	0.0521999	10	22.3687	26.7458	0.518633	0.400204	12.7561	11.4074	0.345232	0.339416	10	225.321	244.602	2.66813	2.6695	106.9	88.449	0.341262	0.406889
11	1.29245	0.495739	0.262018	0.248819	1.38624	1.29721	0.179606	0.161093	11	8.98186	9.55406	0.356553	0.281196	4.53218	6.2585	0.731311	0.716643	11	48.5902	48.6194	0.798351	0.747759	26.5063	26.1521	1.54055	1.47616
12	0.0356933	0.674804	0.251409	0.282946	1.16499	1.00091	0.278939	0.269297	12	6.1545	7.1808	0.269077	0.27955	3.88343	3.22544	1.83738	1.81636	12	16.9828	19.7802	0.396356	0.383372	9.76678	10.5183	2.81245	3.01201
13	0	0	0.215826	0.357695	0.803291	0.838225	0.35328	0.353941	13	3.86279	2.98207	0.211462	0.530784	3.1014	2.85871	2.12061	2.10689	13	9.75663	9.58248	0.491201	0.326511	6.24773	5.12544	3.97709	3.27649
14	0	0	0.24567	0.273302	1.01266	0.674041	0.338526	0.37666	14	2.09473	1.74262	0.15937	0.114973	2.50978	2.4424	2.4941	2.02284	14	6.57596	7.46303	0.286652	0.294501	4.76015	5.47779	3.84398	3.69875
15	0	0	0.241962	0.485841	0.975194	1.15082	0.278996	0.289939	15	2.00212	2.7165	0.233086	0.328003	1.2487	1.5873	2.18802	2.06121	15	5.48163	5.53676	0.447947	0.51779	4.44909	3.91727	2.71711	2.82596

## Sheet: Plasma_Fig5
Plasma
	CD9 (pM)		CD63 (pM)		CD81 (pM)		Albumin (nM)				CD9 (pM)		CD63 (pM)		CD81 (pM)		Albumin (nM)				CD9 (pM)		CD63 (pM)		CD81 (pM)		Albumin (nM)
	Replicate 1	Replicate 2	Replicate 1	Replicate 2	Replicate 1	Replicate 2	Replicate 1	Replicate 2			Replicate 1	Replicate 2	Replicate 1	Replicate 2	Replicate 1	Replicate 2	Replicate 1	Replicate 2			Replicate 1	Replicate 2	Replicate 1	Replicate 2	Replicate 1	Replicate 2	Replicate 1	Replicate 2
Plasma 2B 10mL F7 1	29.7827	29.011	0.449953	0	1.55144	1.13831	0	0.0238294		Plasma 4B 20mL F14 1	237.825	265.81	0	0.798691	4.14068	4.37576	0	0		Plasma 6B 10mL F7 1	11.6512	17.4673	0.232337	0.099293	1.89237	0.80666	0.00341785	0
Plasma 2B 10mL F8 1	2280.45	2492.42	12.036	11.0929	22.1493	17.3815	0	0		Plasma 4B 20mL F15 1	3562.55	4703.89	29.3872	31.2121	79.1882	108.627	0	0		Plasma 6B 10mL F8 1	8534.52	8608.82	0	111.099	589.895	570.133	0.161151	0.154622
Plasma 2B 10mL F9 1	27512.1	36496.4	100.715	114.854	143.504	137.689	0.095423	0.133931		Plasma 4B 20mL F16 1	6924.32	7065.58	93.0479	101.962	299.386	277.118	0.0800199	0.0933211		Plasma 6B 10mL F9 1	7189.12	7025.2	117.162	109.331	636.832	868.204	0.643352	0.673646
Plasma 2B 10mL F10 1	6465.51	7440.01	93.543	94.5073	193.8	187.939	0.479866	0.501262		Plasma 4B 20mL F17 1	2446.33	2347.45	51.7321	52.7932	203.043	264.537	0.071997	0.0598817		Plasma 6B 10mL F10 1	1125.22	1676.14	43.337	41.9831	283.766	314.16	4.08445	4.08445
Plasma 2B 10mL F7 2	53.0893	52.717	0	0	1.3896	0.9316	0	0		Plasma 4B 20mL F14 2	110.74	130.218	0	0.634719	1.42748	2.17668	0	0		Plasma 6B 10mL F7 2	70.268	61.6913	0	0	3.45393	2.58499	0.0131459	0.00614419
Plasma 2B 10mL F8 2	2485.94	2408.48	6.12561	5.26139	16.498	21.338	0.00493094	0.010943		Plasma 4B 20mL F15 2	2335.58	2584.3	17.5091	15.9723	72.1898	74.017	0	0.0131493		Plasma 6B 10mL F8 2	8856.67	7539.55	119.769	122.971	569.746	640.094	0.1837	0.176868
Plasma 2B 10mL F9 2	8899.42	10685.2	88.1466	79.794	141.656	139.213	0.0578173	0.00947149		Plasma 4B 20mL F16 2	3946.45	3853.43	9.55865	59.4407	237.236	213.752	0	0.0254503		Plasma 6B 10mL F9 2	6819.82	7214.7	88.6287	88.9305	512.674	527.131	0.730712	0.754359
Plasma 2B 10mL F10 2	4404.37	3861.05	71.5037	71.7741	205.773	209.377	0.39098	0.380964		Plasma 4B 20mL F17 2	1444.79	1333.71	37.8274	0	238.184	235.898	0.0422938	0.0597879		Plasma 6B 10mL F10 2	1634.47	1472.05	42.173	50.0136	299.551	300.626	4.346	3.60006
Plasma 2B 10mL F7 3	59.9041	47.6223	0	0	0.655797	0.413472	0	0		Plasma 4B 20mL F14 3	394.927	374.082	0	0.304385	5.70643	4.79011	0	0		Plasma 6B 10mL F7 3	28.3431	51.8539	0	0	1.66363	1.13595	0	0.00440258
Plasma 2B 10mL F8 3	0	2097.87	3.81773	5.31559	16.7259	16.4157	0	0		Plasma 4B 20mL F15 3	6021.56	0	33.1801	33.393	155.988	158.261	0.019037	0.00155176		Plasma 6B 10mL F8 3	4342.63	3940.77	90.7852	113.647	553.268	533.338	0.133805	0.123632
Plasma 2B 10mL F9 3	6092.91	5723.44	51.9686	56.617	138.723	121.389	0.127527	0.118725		Plasma 4B 20mL F16 3	8616.33	8658.59	97.8553	98.1516	336.851	319.426	0.0210771	0.0439331		Plasma 6B 10mL F9 3	0	4628.89	107.733	50.2653	647.549	1063.79	0.735237	0.594215
Plasma 2B 10mL F10 3	3437.81	3388.49	59.2222	60.8876	203.407	193.967	0.608035	0.610511		Plasma 4B 20mL F17 3	0	2389.39	45.6388	54.623	332.901	320.584	0.0595423	0.0562607		Plasma 6B 10mL F10 3	910.854	1701.33	46.5284	46.0455	389.955	313.638	3.89918	3.7801
Plasma 2B 10mL F7 4	77.7438	73.7592	1.19539	0.162271	2.21317	0	0	0.0285074		Plasma 4B 20mL F14 4	388.89	420.379	0.449978	0	4.83986	5.17427	0	0		Plasma 6B 10mL F7 4	28.9085	21.1339	0	0	1.61345	2.63513	0.00191177	0
Plasma 2B 10mL F8 4	3952.17	4112.76	11.279	14.084	32.6745	31.906	0.0720404	0.0392542		Plasma 4B 20mL F15 4	6944.42	7902.39	45.5753	50.0117	149.489	158.01	0.00731997	0		Plasma 6B 10mL F8 4	3176.19	3556.15	90.5606	101.533	589.911	589.001	0.172376	0.123831
Plasma 2B 10mL F9 4	11629.9	10713.9	92.0667	93.4007	163.526	160.577	0.178773	0.195393		Plasma 4B 20mL F16 4	8192.71	9149.66	16.9534	89.8117	288.484	298.064	0.0396602	0.00951987		Plasma 6B 10mL F9 4	3628.12	2401.92	99.0468	96.3112	557.875	652.577	0.673944	0.542284
Plasma 2B 10mL F10 4	5086.57	5202.05	67.7146	67.2599	206.782	192.996	0.846227	0.875386		Plasma 4B 20mL F17 4	2012.35	1962.94	45.6882	42.8156	233.546	238.77	0.0488977	0.0333008		Plasma 6B 10mL F10 4	1712.78	1708.14	51.7946	46.7675	399.004	423.277	3.71808	0

## Sheet: CSF_Fig5
CSF
	CD9 (pM)		CD63 (pM)		CD81 (pM)		Albumin (nM)				CD9 (pM)		CD63 (pM)		CD81 (pM)		Albumin (nM)				CD9 (pM)		CD63 (pM)		CD81 (pM)		Albumin (nM)
	Replicate 1	Replicate 2	Replicate 1	Replicate 2	Replicate 1	Replicate 2	Replicate 1	Replicate 2			Replicate 1	Replicate 2	Replicate 1	Replicate 2	Replicate 1	Replicate 2	Replicate 1	Replicate 2			Replicate 1	Replicate 2	Replicate 1	Replicate 2	Replicate 1	Replicate 2	Replicate 1	Replicate 2
CSF 2B 10mL 1 F7	1.29947	1.67206	0.439146	0	0	0.127851	0	0.00396238		CSF 4B 10mL 1 F7	3.69857	1.88051	0.205622	0	2.46901	0.3549	0.0390482	0.0125128		CSF 6B 10mL 1 F7	3.08821	0.310041	0.205116	0.508003	0.355578	0	0.00809201	0.0397203
CSF 2B 10mL 1 F8	3.35871	8.02147	0.577531	0.177885	4.11924	5.60142	0.0481596	0.0325798		CSF 4B 10mL 1 F8	6.46137	0	0	0	22.6698	17.0492	0.0469361	0.0375894		CSF 6B 10mL 1 F8	6.91961	4.35767	0.466968	0.235606	62.7236	50.7074	0.0858197	0.10499
CSF 2B 10mL 1 F9	9.34008	2.48334	0.613219	0	0	21.6718	0.0524085	0.0222981		CSF 4B 10mL 1 F9	7.63551	2.83501	0	0.481544	50.2852	41.3377	0.609209	0.603209		CSF 6B 10mL 1 F9	28.6023	25.1613	1.00108	0.634446	263.869	258.386	0.635746	0.727702
CSF 2B 10mL 1 F10	9.20801	13.5289	0.417195	0.199198	31.3439	42.8602	0.144517	0.212922		CSF 4B 10mL 1 F10	10.2155	8.50848	0	0	49.6654	57.2276	0.315041	0.31311		CSF 6B 10mL 1 F10	25.1719	26.1542	0.378699	1.02554	85.5115	77.1387	2.2741	2.60361
CSF 2B 10mL 2 F7	1.86359	3.47044	0	0	0	0	0.0388443	0.0179246		CSF 4B 10mL 2 F7	2.16488	0.382027	0	0	1.55578	3.37679	0.00835312	0.0408648		CSF 6B 10mL 2 F7	2.56285	2.43993	0	0.314025	3.24211	0.046355	0.0899724	0.091889
CSF 2B 10mL 2 F8	2.28029	4.83363	0	0.682346	5.03504	8.34399	0.0010125	0		CSF 4B 10mL 2 F8	6.6868	8.8176	0	0.225745	23.6722	0	0.0309145	0.0442198		CSF 6B 10mL 2 F8	6.43358	10.0423	0.425779	0.434547	26.3756	0	0.12979	0.136878
CSF 2B 10mL 2 F9	4.5424	5.94474	0	1.03943	21.6606	17.1896	0.0522577	0.0253029		CSF 4B 10mL 2 F9	16.8003	10.1553	0	0.00965354	43.6261	45.5682	0.0952808	0.113806		CSF 6B 10mL 2 F9	17.1384	22.4603	0.424652	0	104.741	93.3509	0.329879	0.437433
CSF 2B 10mL 2 F10	8.10136	6.38584	0	0	25.9073	38.2944	0.171825	0.229805		CSF 4B 10mL 2 F10	5.69348	8.26034	0	0.275759	45.585	40.6715	0.37263	0.301966		CSF 6B 10mL 2 F10	10.8359	9.40982	0.517715	0.359	50.3892	82.6121	1.92278	1.8568
CSF 2B 10mL 3 F7	2.03266	4.20224	0.188552	0	0.088116	0.126385	0.0150013	0.0200868		CSF 4B 10mL 3 F7	2.38451	0.979518	0	0	1.95049	1.02896	0.0195502	0.0389348		CSF 6B 10mL 3 F7	1.69814	2.0416	0	0.141128	2.35289	1.01394	0.0666818	0.0983782
CSF 2B 10mL 3 F8	3.00065	5.29487	0	0	5.48631	3.19361	0.00599635	0.0260682		CSF 4B 10mL 3 F8	12.4685	11.1121	1.13541	0.35361	25.8073	33.2342	0.10527	0.0612646		CSF 6B 10mL 3 F8	3.3806	4.22005	0	0.276047	20.3099	21.9982	0.105447	0.114556
CSF 2B 10mL 3 F9	4.87484	4.87278	0.507192	0.576926	17.6083	16.5373	0.0245589	0.0344348		CSF 4B 10mL 3 F9	12.5452	11.3256	0	0.0578926	2.82961	0	0.0908887	0.0970609		CSF 6B 10mL 3 F9	12.9315	16.5381	0.719001	0.91539	89.4309	80.155	0	0.38712
CSF 2B 10mL 3 F10	6.4442	9.63759	0.516361	0	46.6672	37.645	0.2388	0.0643789		CSF 4B 10mL 3 F10	5.54426	3.70198	0	0	27.9248	28.3618	0.166502	0.148765		CSF 6B 10mL 3 F10	1.13593	9.0517	1.48255	3.21104	20.6834	56.4798	1.77228	1.75546
CSF 2B 10mL 4 F7	0.899352	0	0	0.332684	0	1.57013	0	0.0162918		CSF 4B 10mL 4 F7	4.92084	3.37973	0	0.246217	3.1363	2.74181	0.0303899	0		CSF 6B 10mL 4 F7	3.5527	1.53825	0	0	0.107204	1.19065	0.0629128	0.0949071
CSF 2B 10mL 4 F8	0.562849	0	0	0	3.09228	4.50958	0	0		CSF 4B 10mL 4 F8	9.71905	1.26751	0.0339419	0.819604	21.1783	16.8926	0.00372854	0.0596118		CSF 6B 10mL 4 F8	6.46941	4.24976	0	0.320071	69.5484	77.2647	0.16165	0.188524
CSF 2B 10mL 4 F9	5.83167	8.80121	0.263245	0.113689	0	23.9288	0.0703637	0.0623565		CSF 4B 10mL 4 F9	9.14202	12.0915	0.280671	0	45.9629	52.5146	0.0925645	0.0855644		CSF 6B 10mL 4 F9	58.5871	78.9286	1.93693	2.02801	383.94	399.14	1.31175	1.25626
CSF 2B 10mL 4 F10	12.7325	9.06871	0.0257225	0	48.1886	47.9177	0.160857	0.222732		CSF 4B 10mL 4 F10	0.865937	5.49086	0	0.422886	41.8656	41.7645	0.284288	0.287078		CSF 6B 10mL 4 F10	42.6799	40.0191	1.35944	0.115911	49.8378	60.6084	2.53604	2.5479
