# Supplementary figures and images for: Framework for rapid comparison of extracellular vesicle isolation methods
Source: eLife journal article supplement (doi:10.7554/elife.70725), 2021-11-16

**a.**

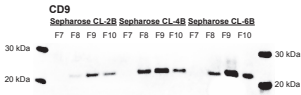

**b.**

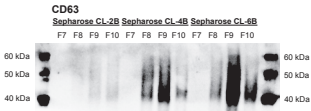

**c.**

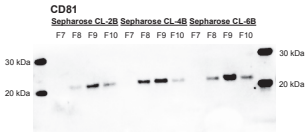

Supplement: supp [file elife-70725-supp-v1.zip]

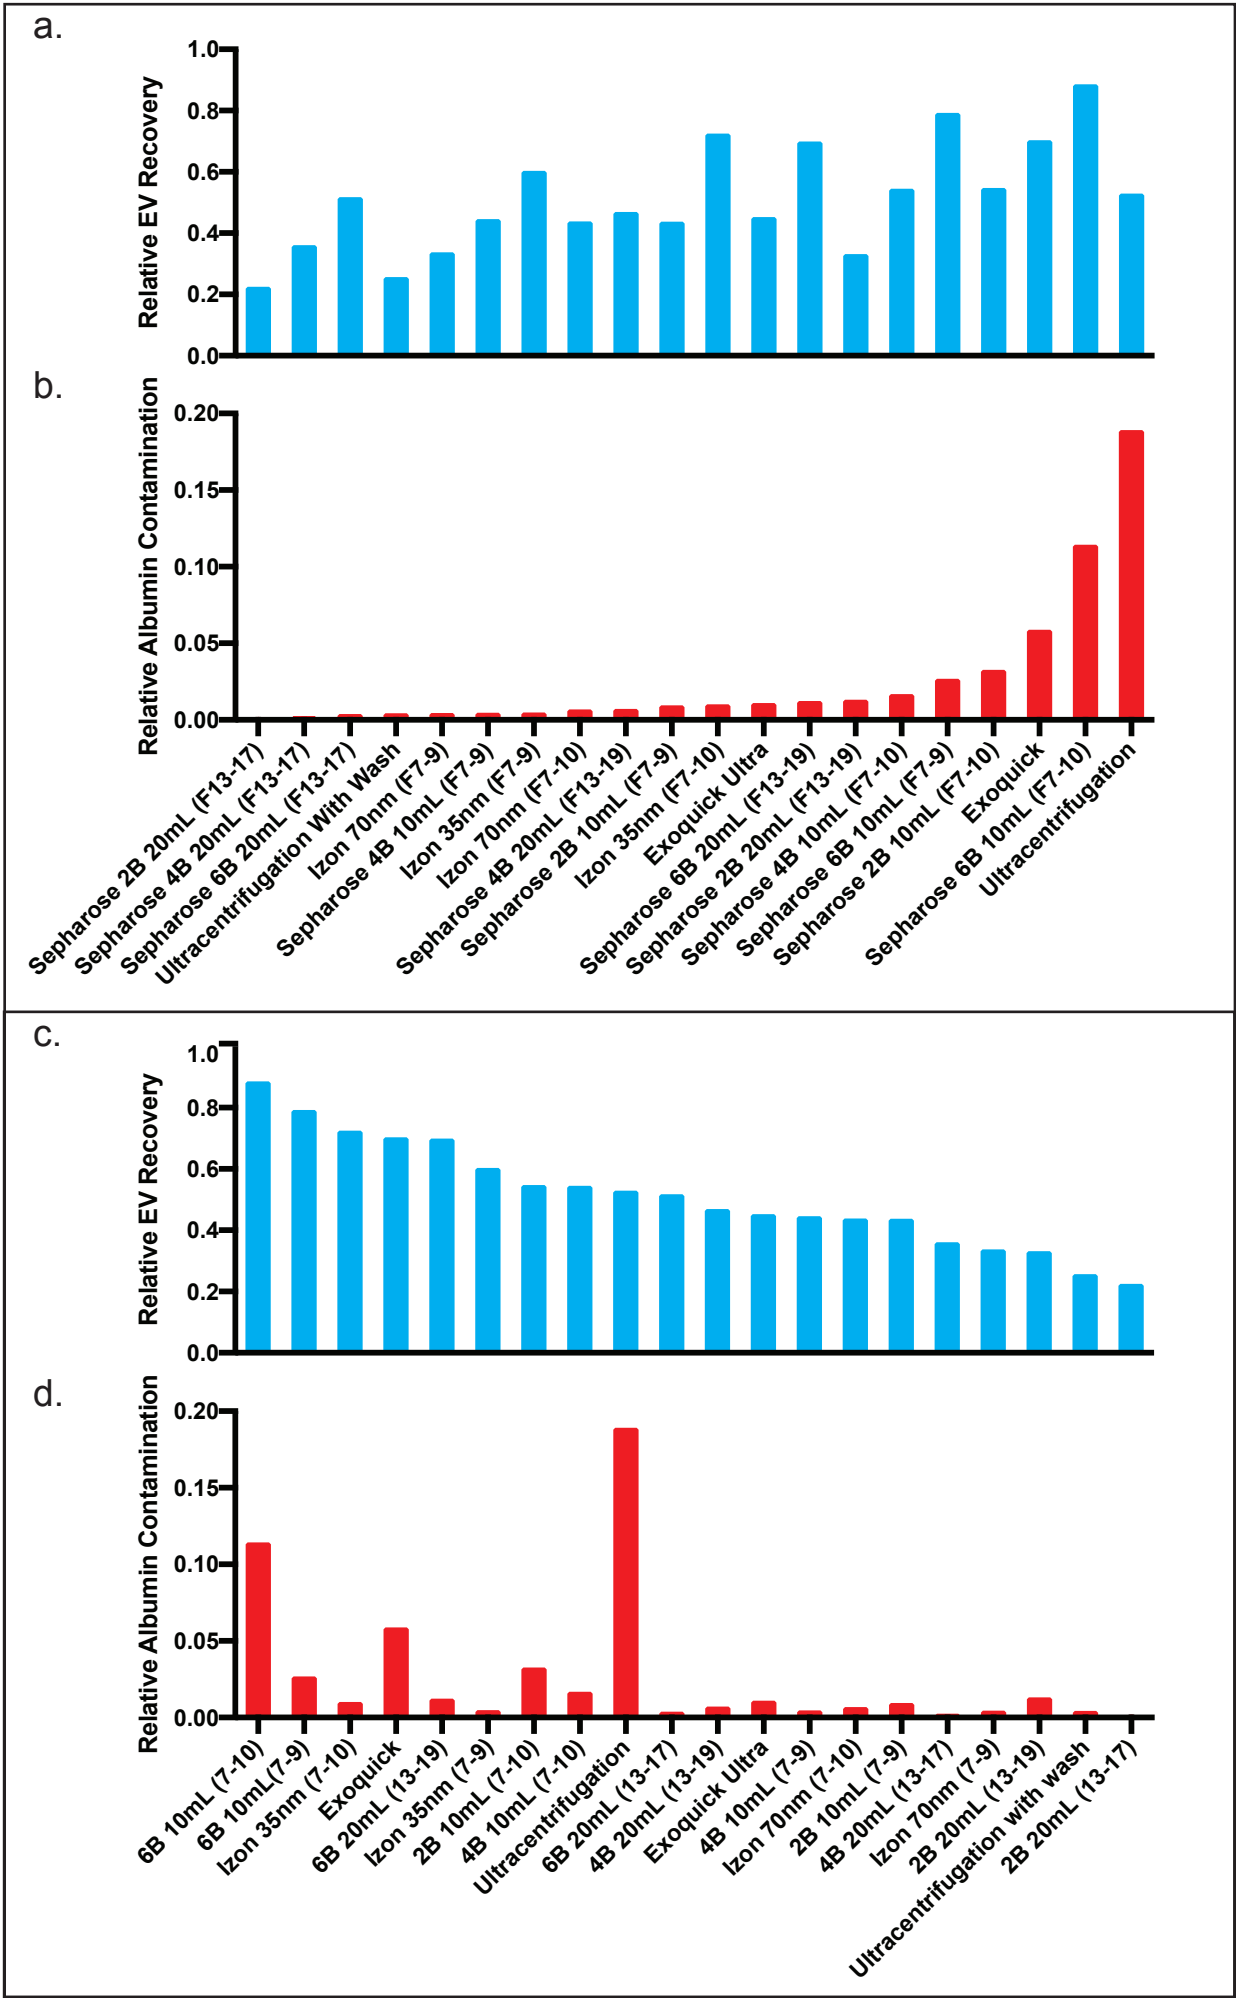

Supplement: supp [file elife-70725-supp-v1.zip]

a.

CD9

CD63

CD81

Albumin

0.1mL

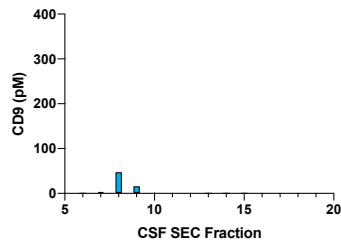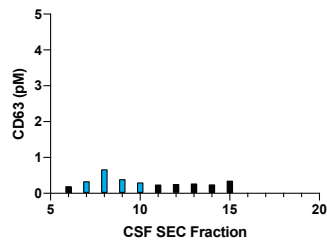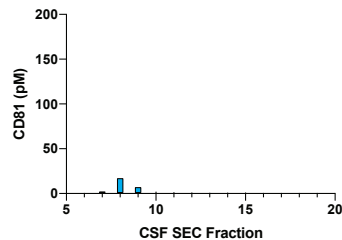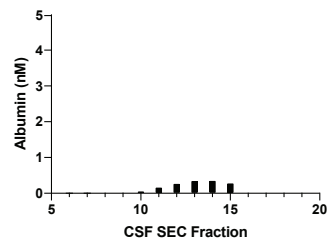

b.

0.5mL

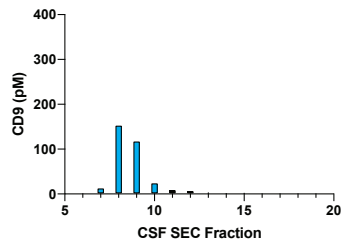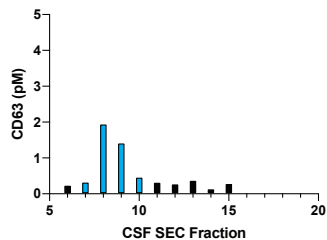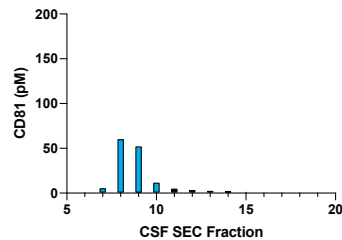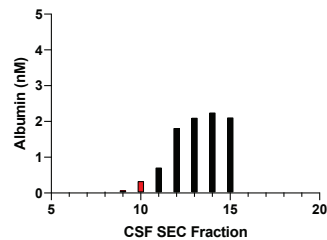

c.

1.0mL

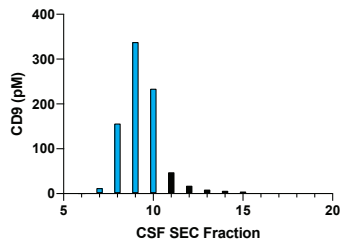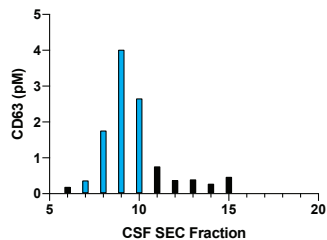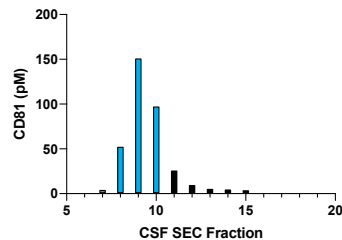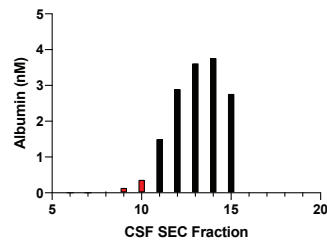

Supplement: supp [file elife-70725-supp-v1.zip]

# Plasma

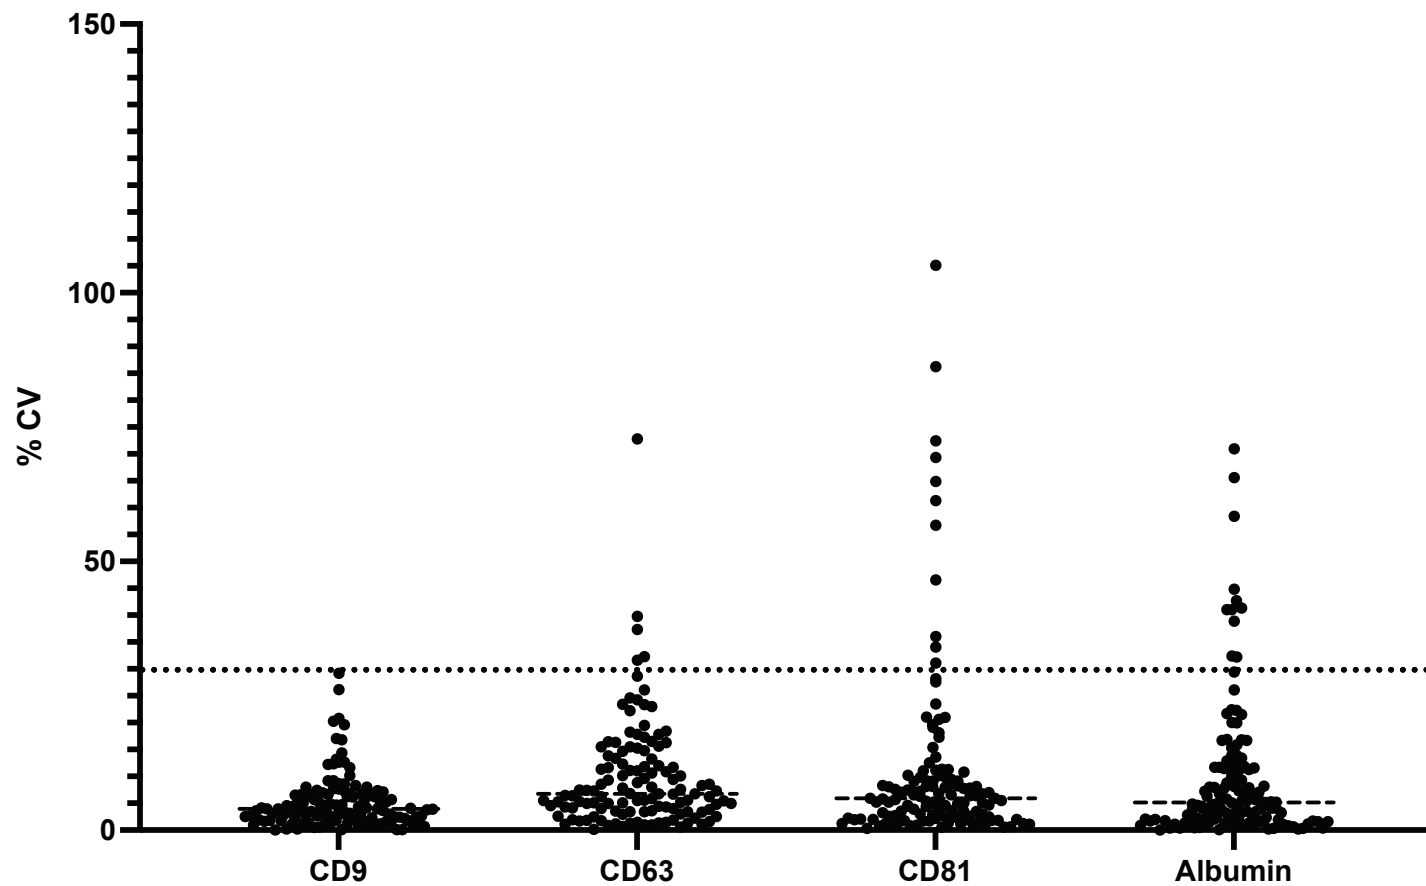

Supplement: supp [file elife-70725-supp-v1.zip]

## Plasma

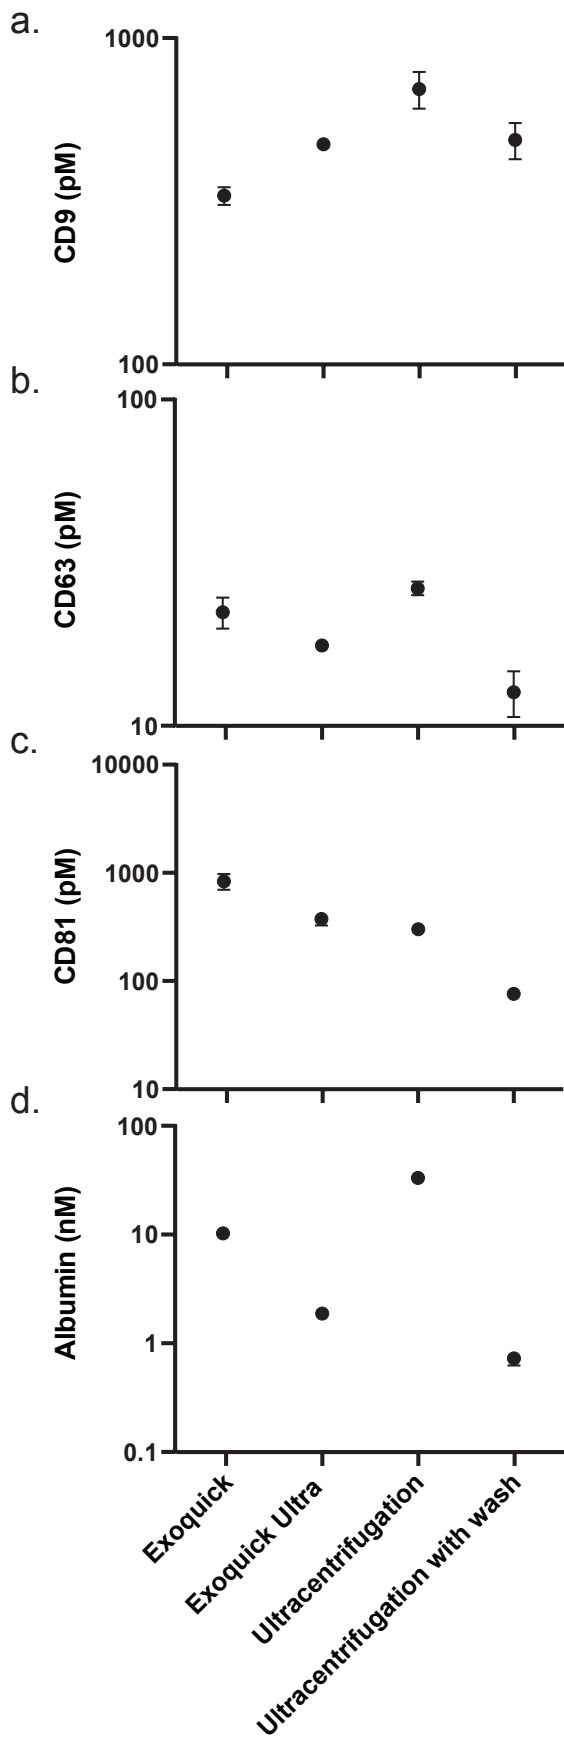

## CSF

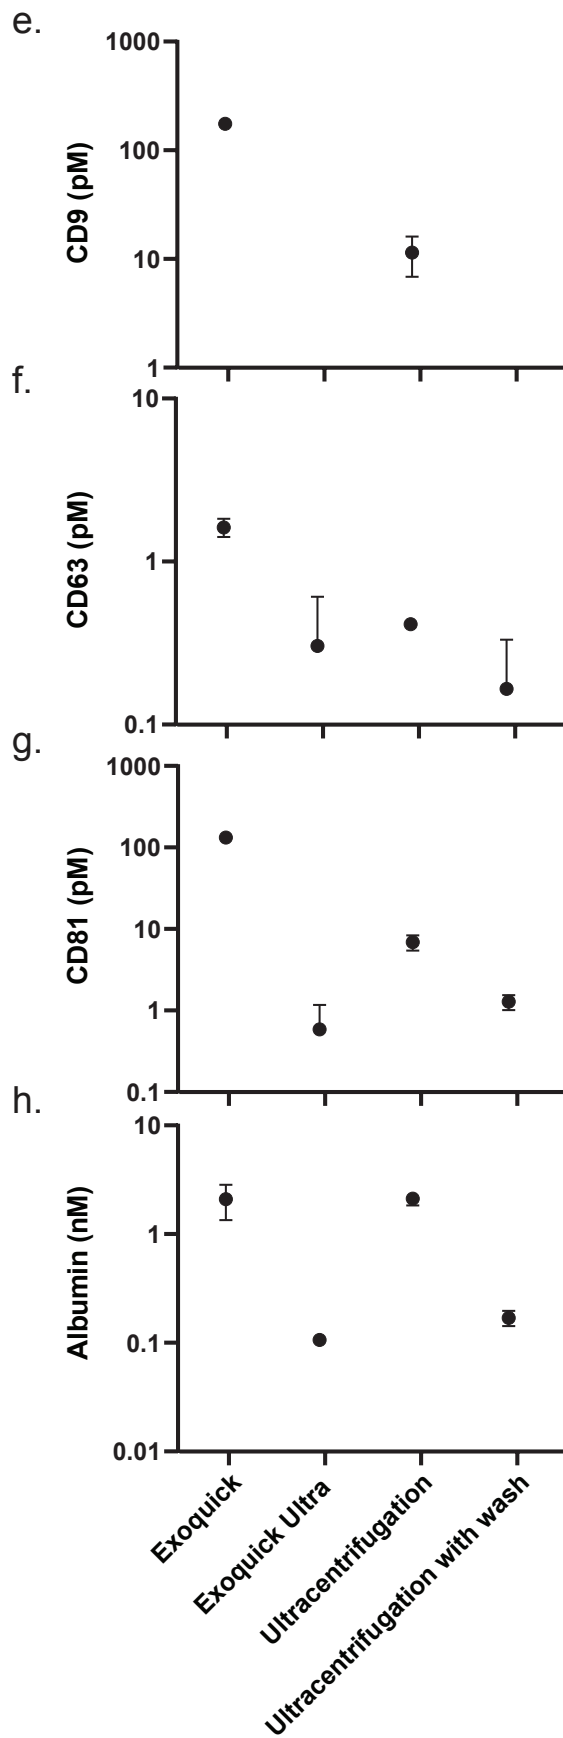

Supplement: supp [file elife-70725-supp-v1.zip]

# CSF

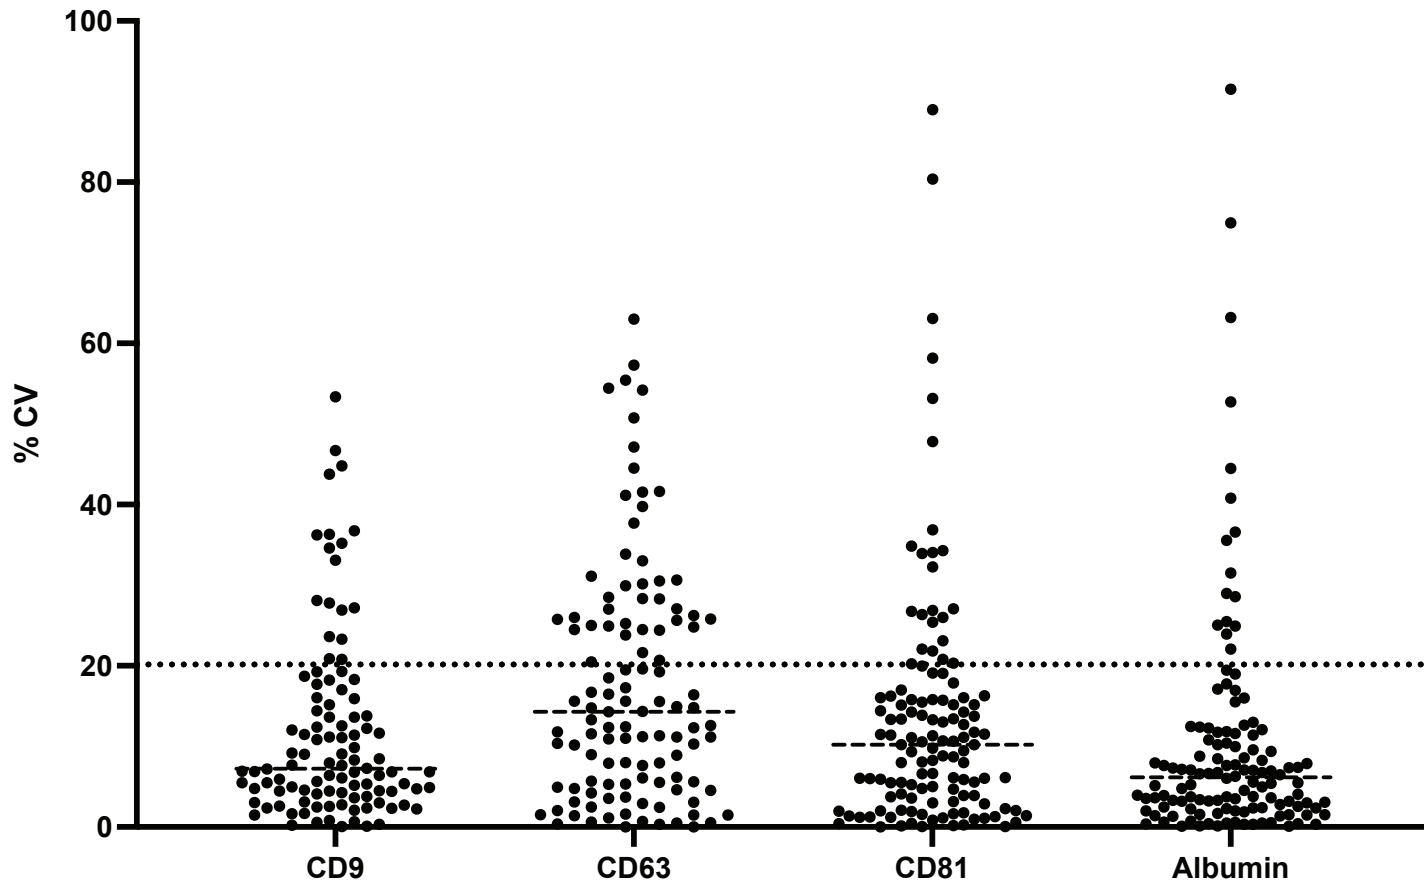

Supplement: supp [file elife-70725-supp-v1.zip]

a.

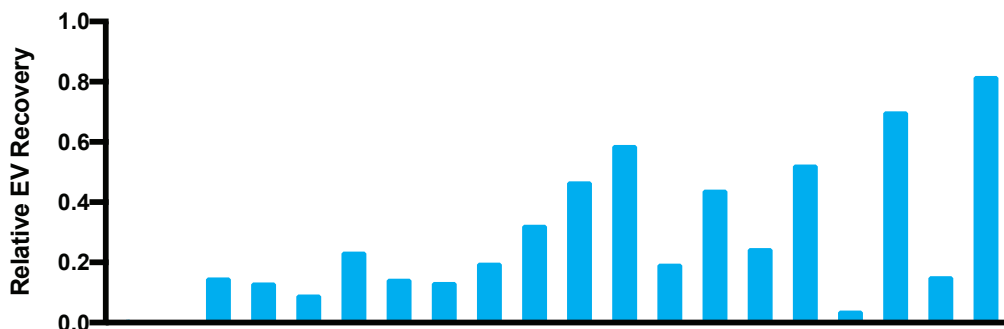

b.

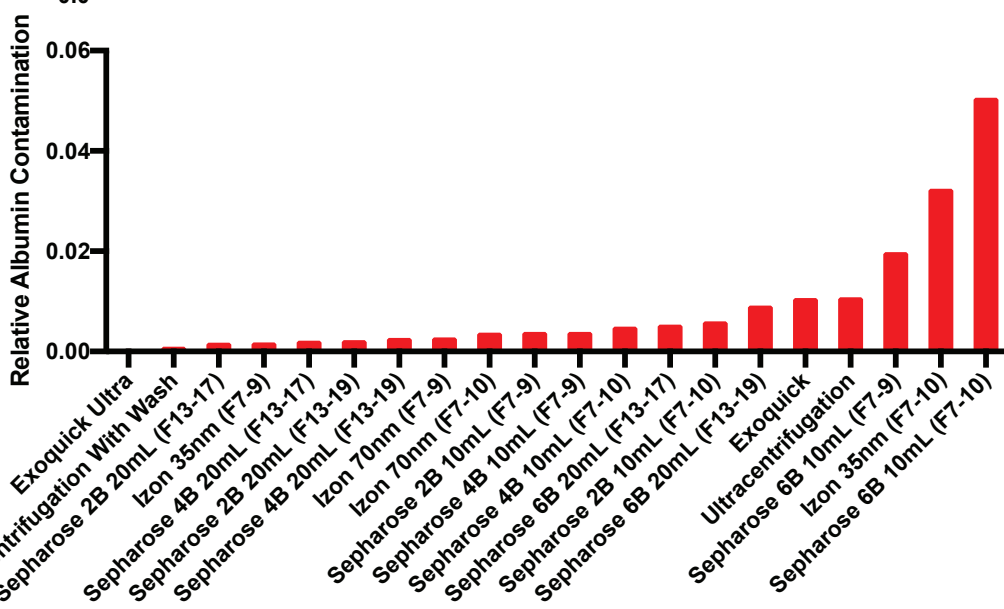

C.

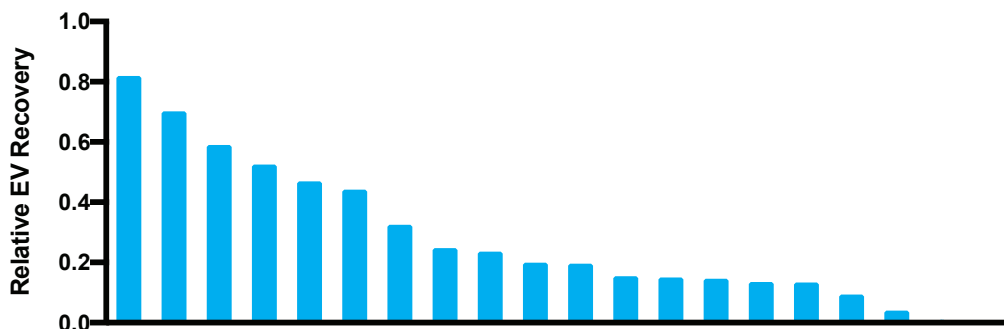

d.

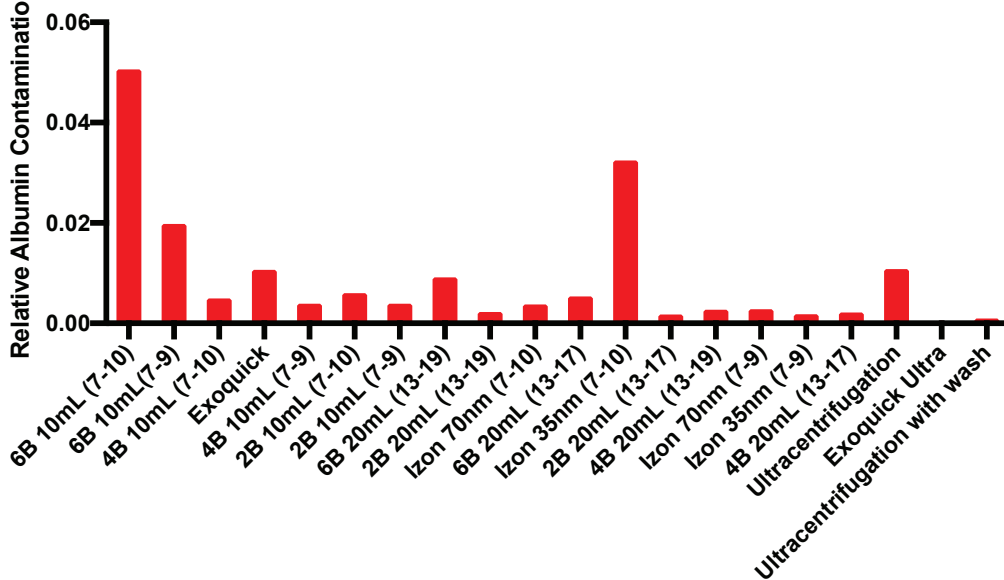

Supplement: supp [file elife-70725-supp-v1.zip]

a.

CD9

CD63

CD81

Albumin

0.1mL

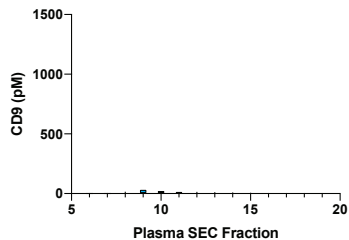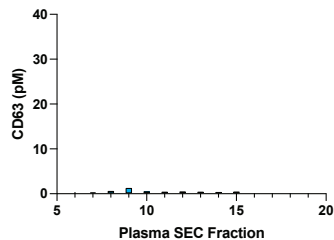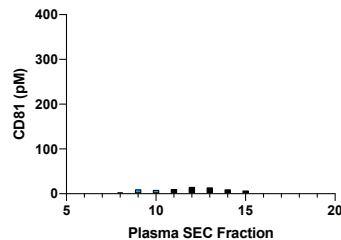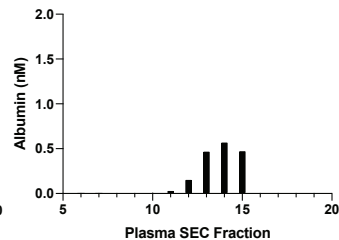

b.

0.5mL

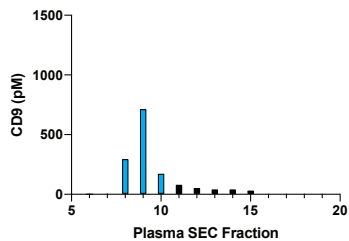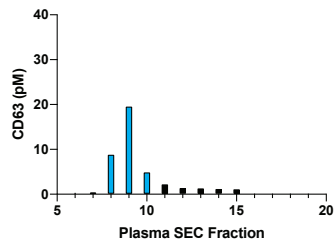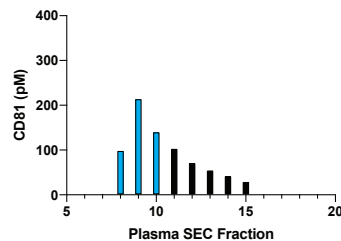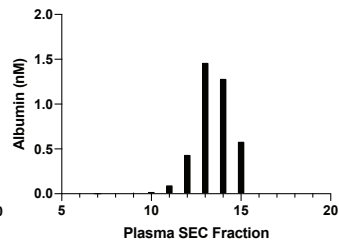

c.

1.0mL

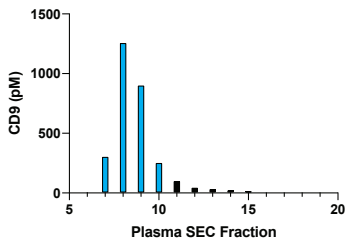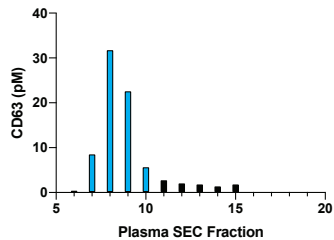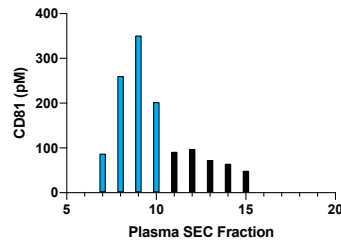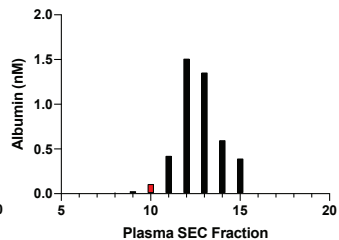

Supplement: supp [file elife-70725-supp-v1.zip]

a.

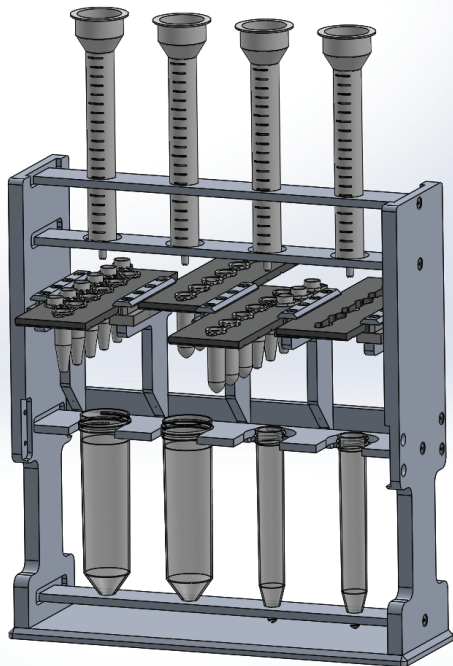

b.

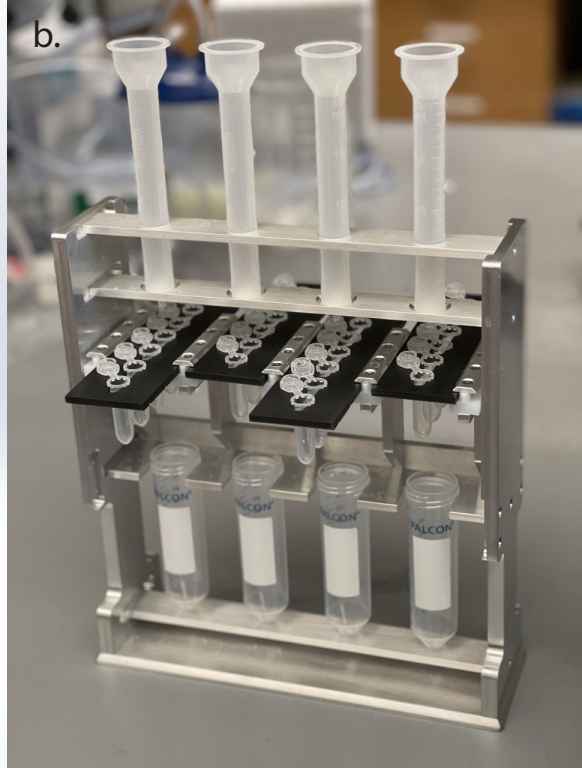

Supplement: supp [file elife-70725-supp-v1.zip]
